# Supplementary material for: Accuracy of Tests for Diagnosis of Animal Tuberculosis: Moving Away from the Golden Calf (and towards Bayesian Models)
Source: Hindawi journal article supplement (doi:10.1155/2023/7615716), 2023-02-21

## Supplementary Material 3

### **Accuracy of Tests for Diagnosis of Animal Tuberculosis: Moving Away from the Golden Calf (and towards Bayesian Models)**

Alberto Gomez-Buendia<sup>1</sup>, Pilar Pozo<sup>1</sup>, Catalina Picasso-Risso<sup>2,3</sup>, Adam Branscum<sup>4</sup>,  
Andres Perez<sup>2</sup>, Julio Alvarez<sup>1,5\*</sup>

<sup>1</sup> VISAVET Health Surveillance Centre, Universidad Complutense de Madrid, Spain

<sup>2</sup> Veterinary Population Medicine Department, University of Minnesota, St Paul  
Minnesota, United States

<sup>3</sup> Facultad de Veterinaria, Universidad de la República, Montevideo, Uruguay

<sup>4</sup> Biostatistics Program, Oregon State University, Corvallis Oregon, United States

<sup>5</sup> Departamento de Sanidad Animal, Facultad de Veterinaria, Universidad Complutense  
de Madrid, Madrid, Spain

**\* Correspondence:**

Dr. Julio Álvarez

[jalvarez@visavet.ucm.es](mailto:jalvarez@visavet.ucm.es)

**Prior and posterior distributions of sensitivities of ante-mortem and post-mortem diagnostic tests for tuberculosis based on informative priors**

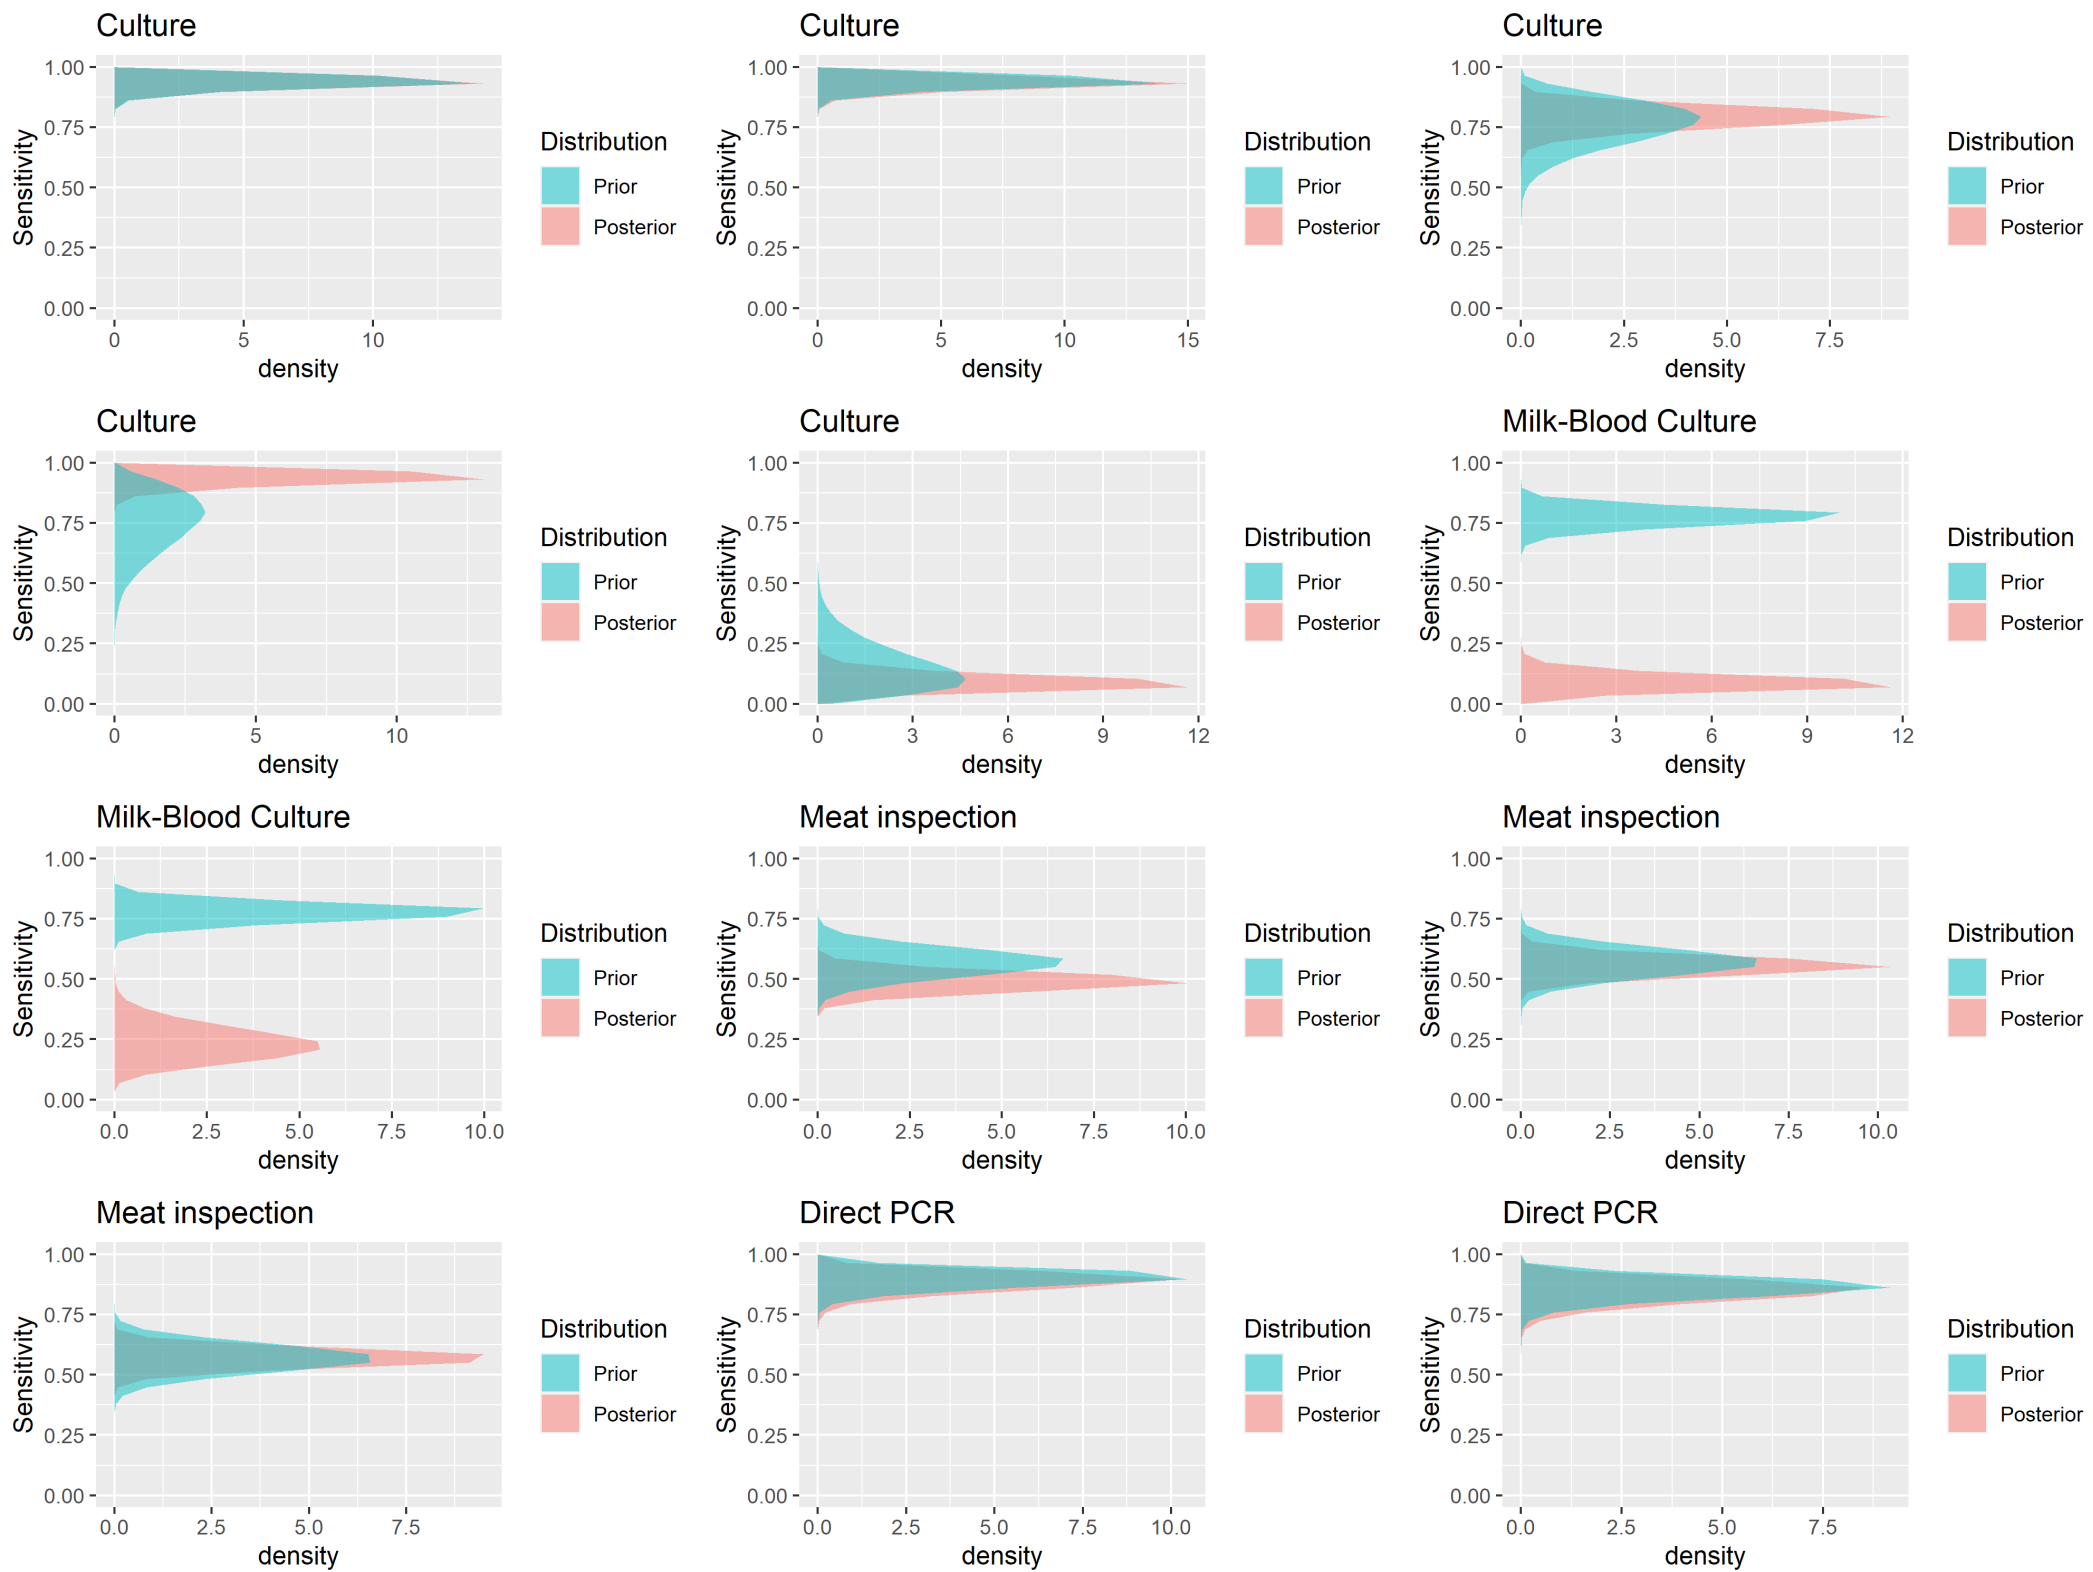

## Direct PCR

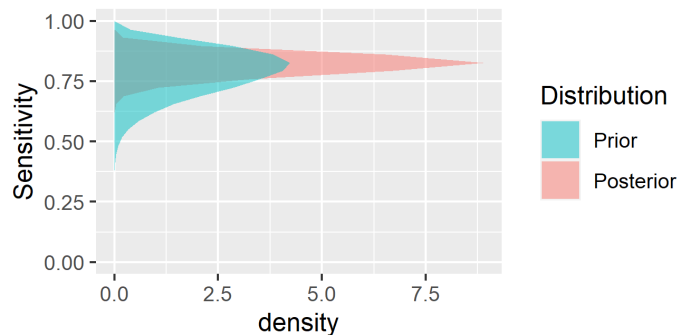

## Direct PCR

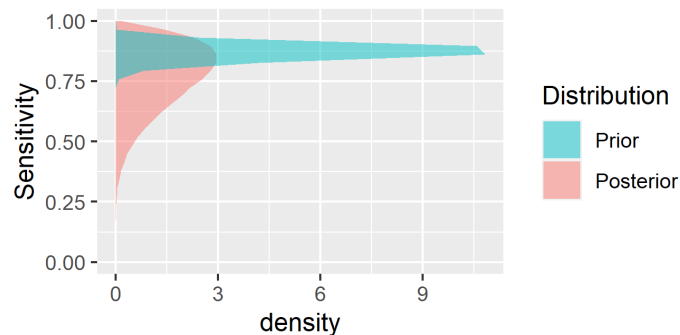

## Body Fluid Direct PCR

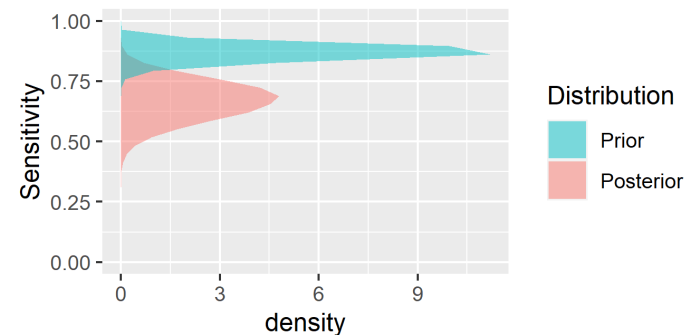

## Body Fluid Direct PCR

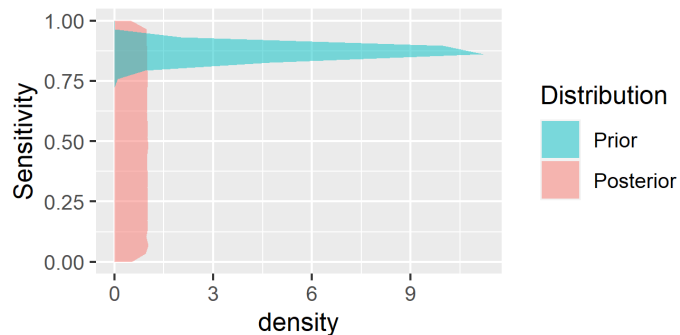

## Serology

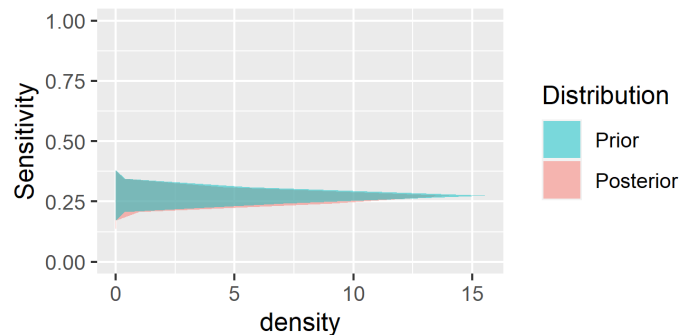

## Serology

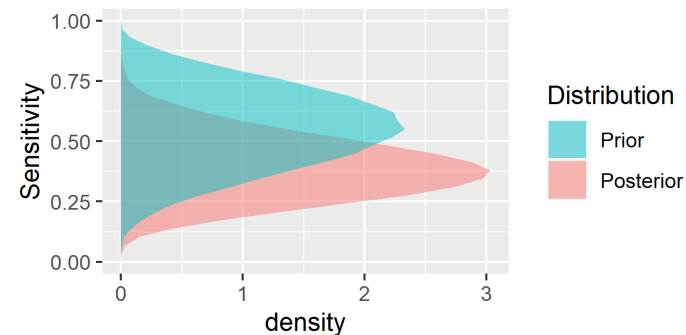

## Serology

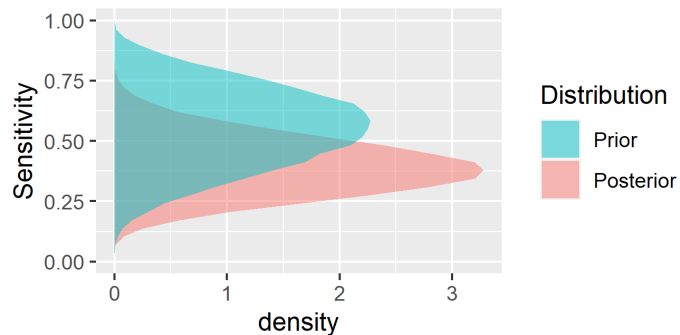

## Serology

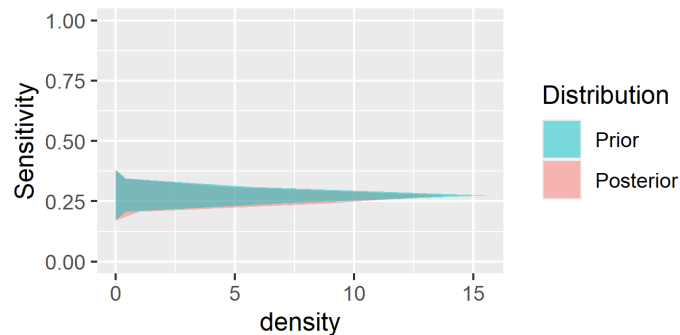

## Serology

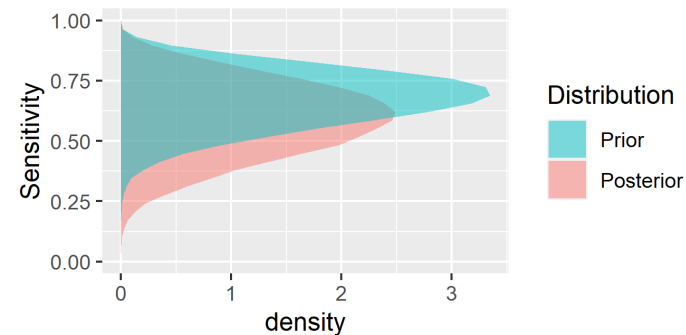

## Serology

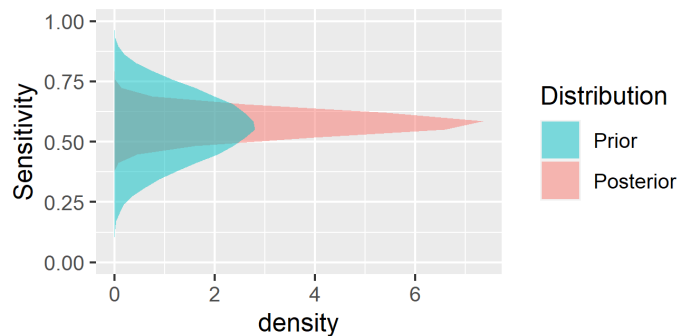

## Serology

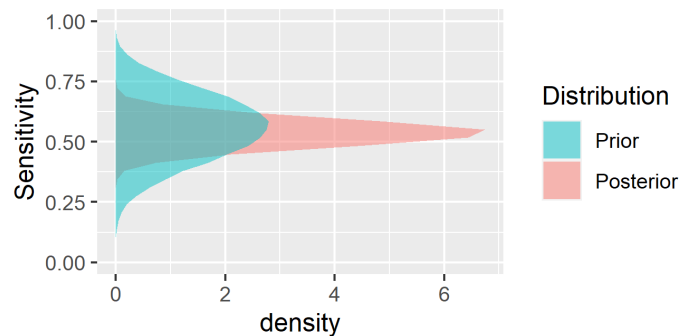

## Serology

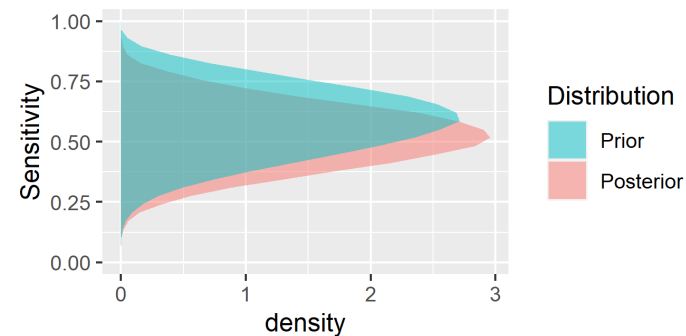

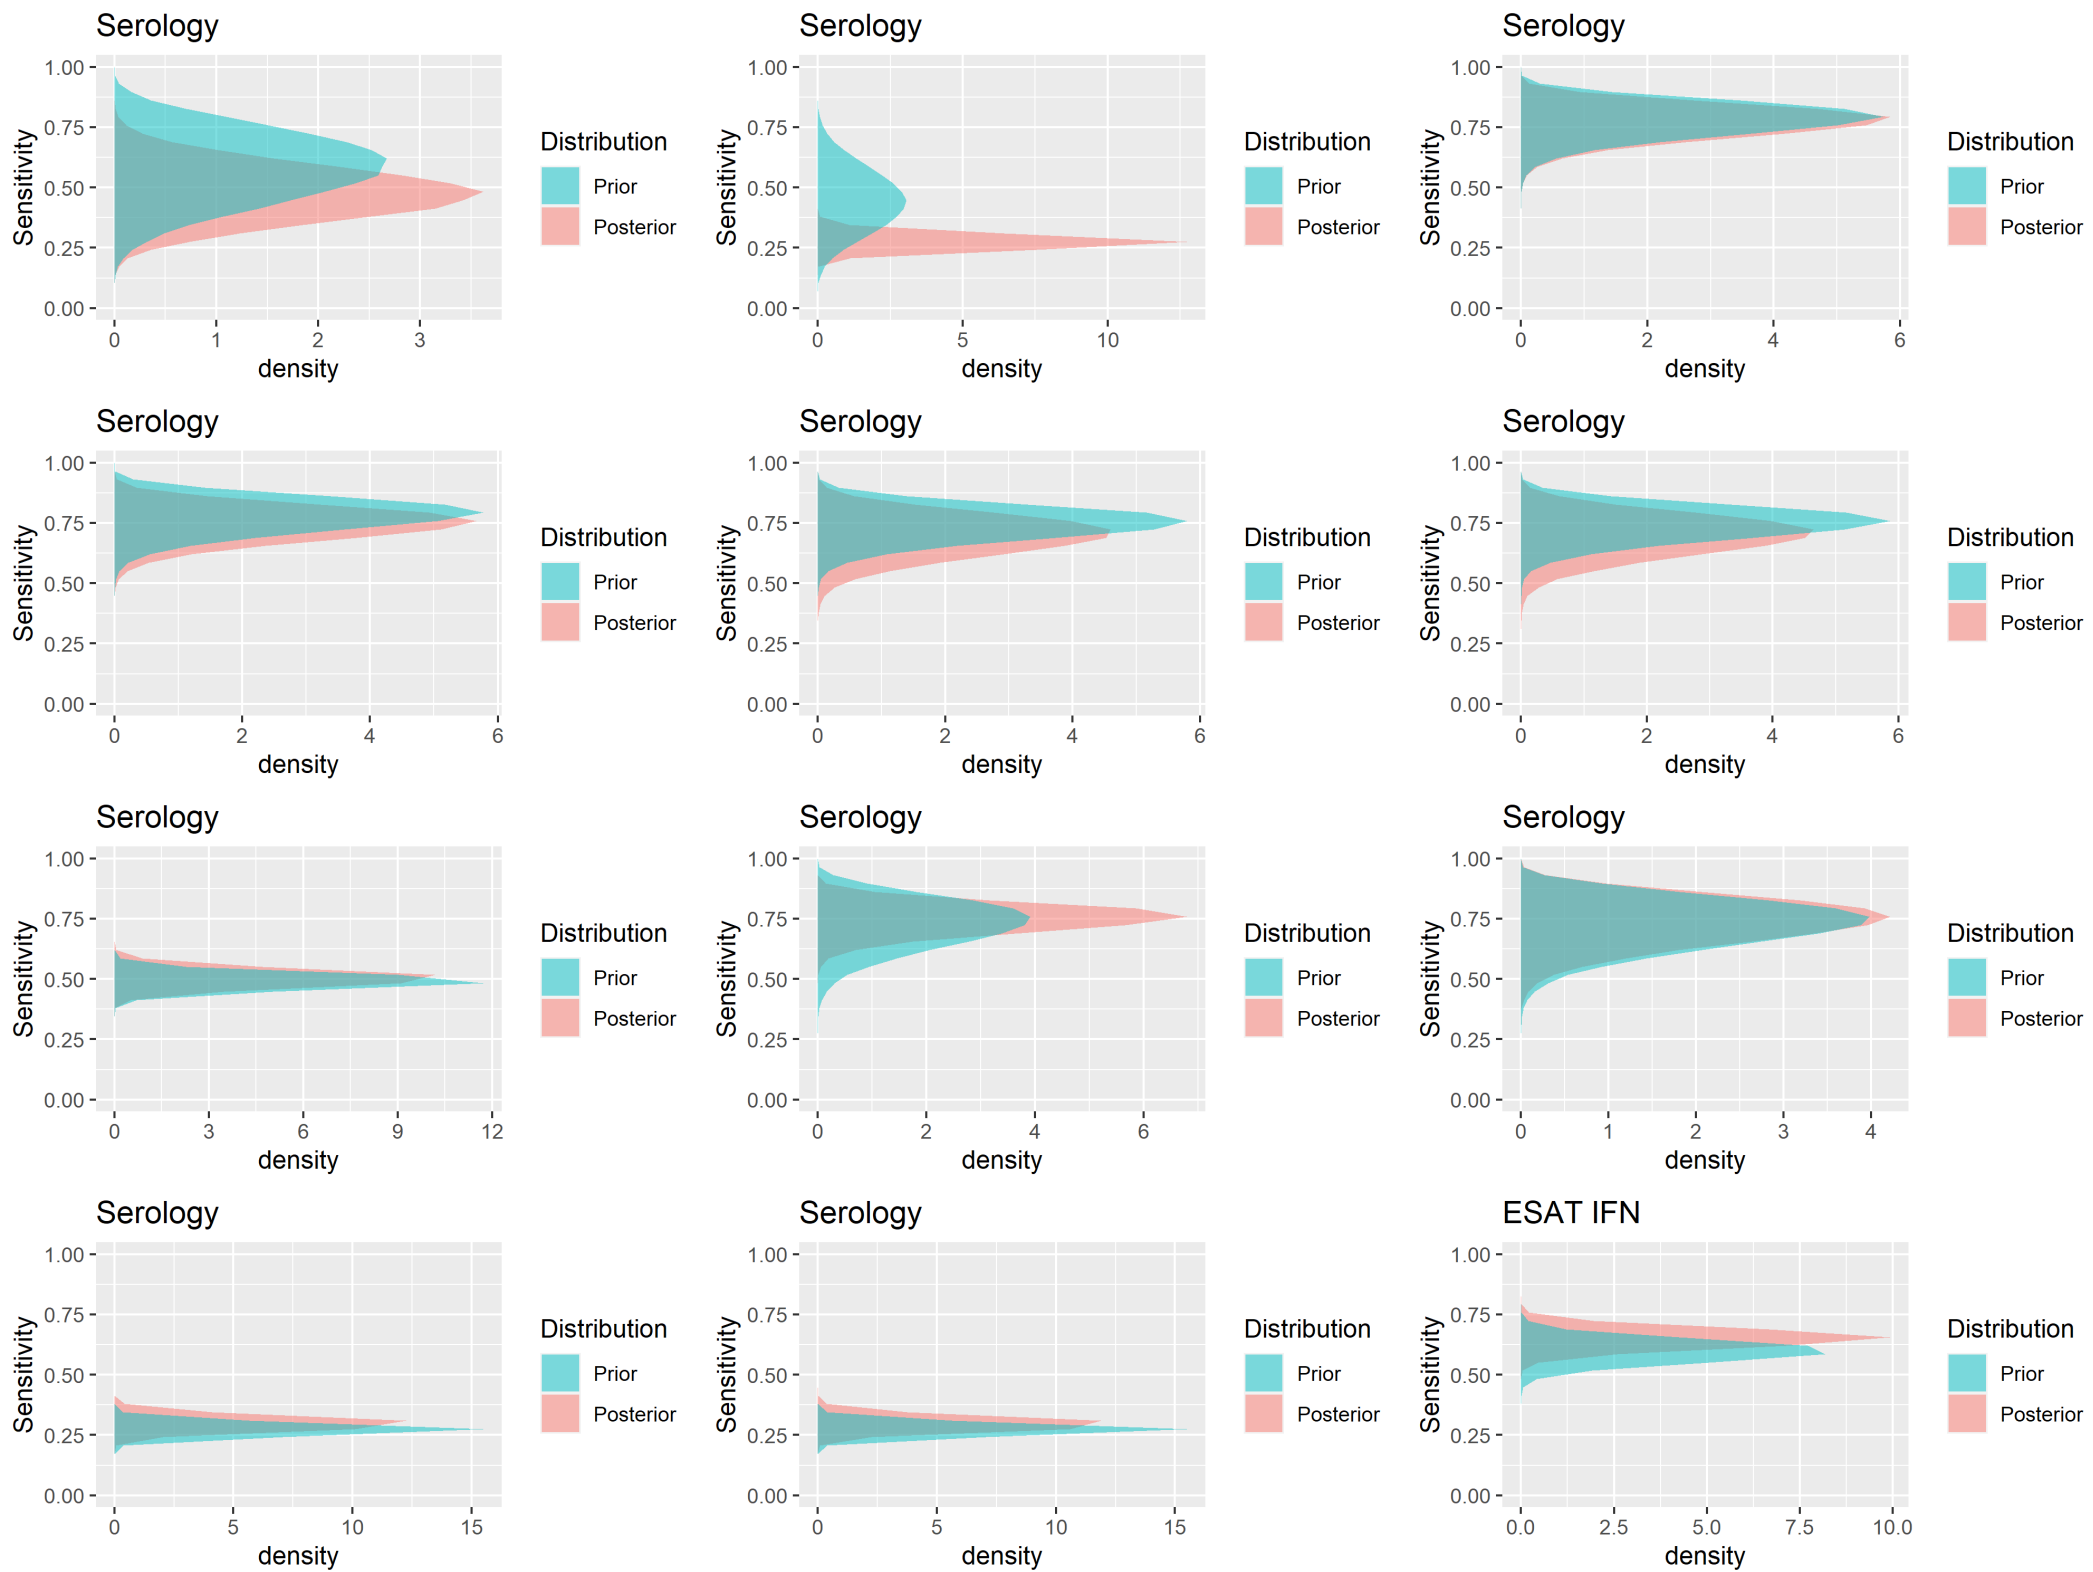

ESAT IFN

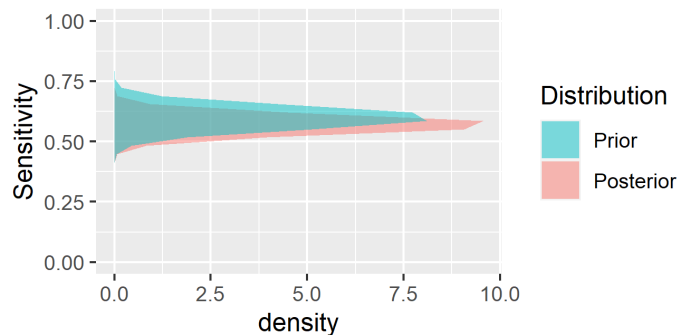

ESAT IFN

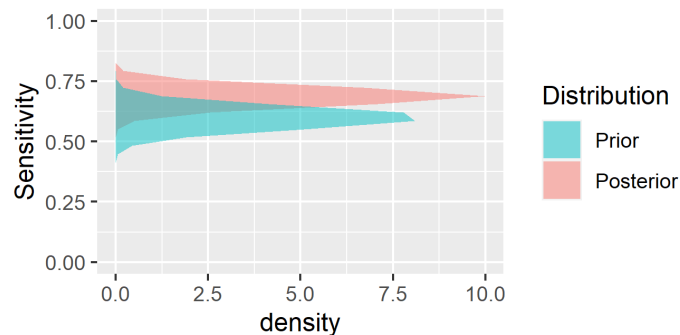

ESAT IFN

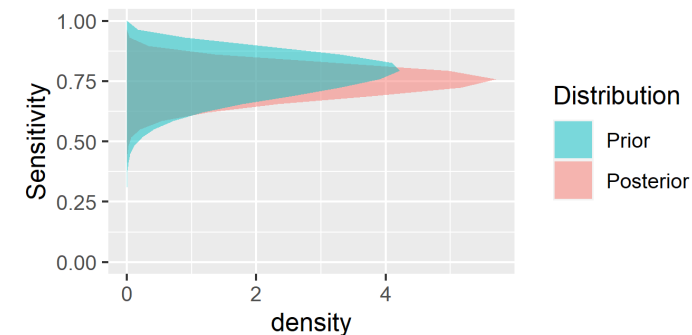

ESAT IFN

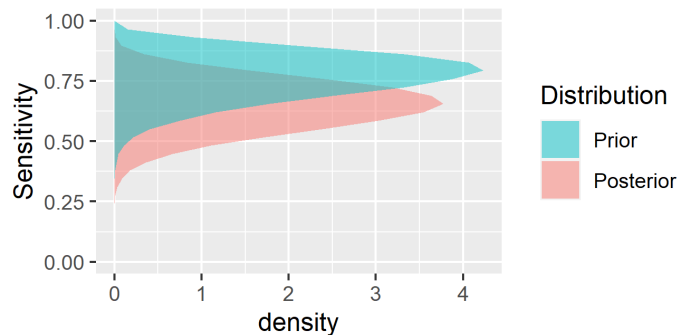

## In-house IFN

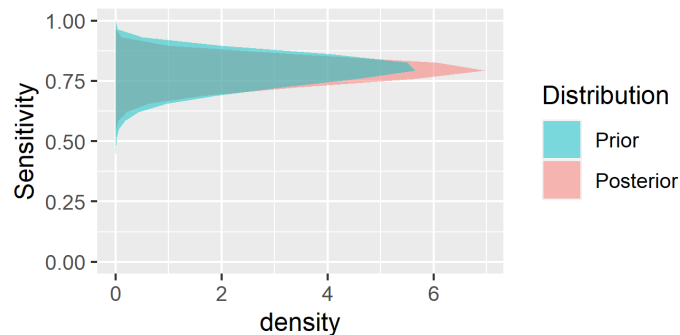

Bovigam OD 0.05 IFN

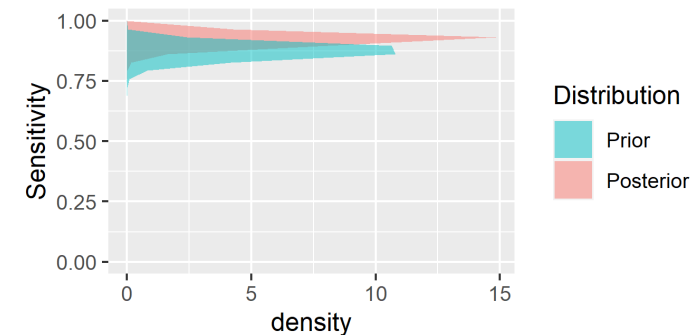

Bovigam OD 0.05 IFN

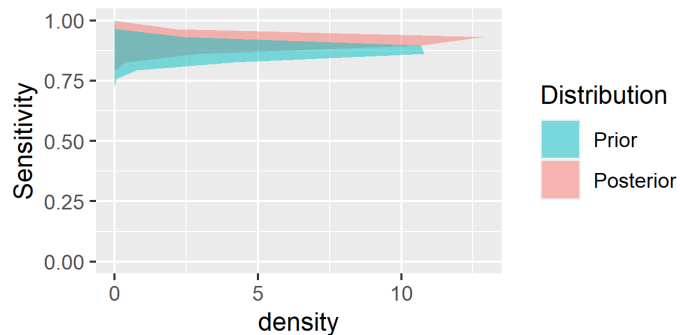

Bovigam OD 0.05 IFN

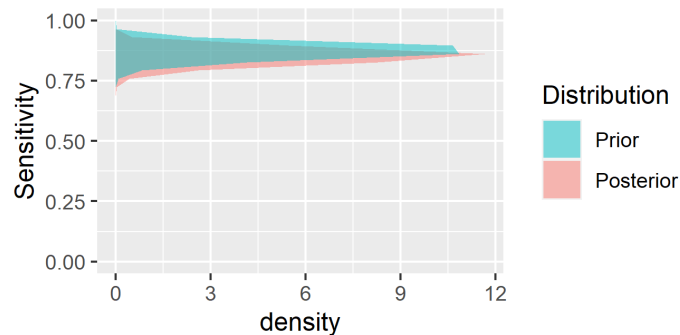

Bovigam OD 0.05 IFN

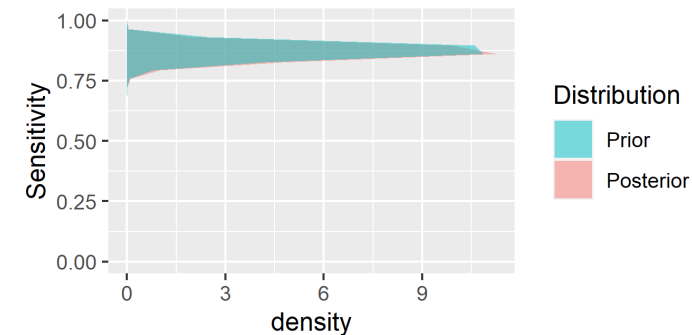

Bovigam OD 0.05 IFN

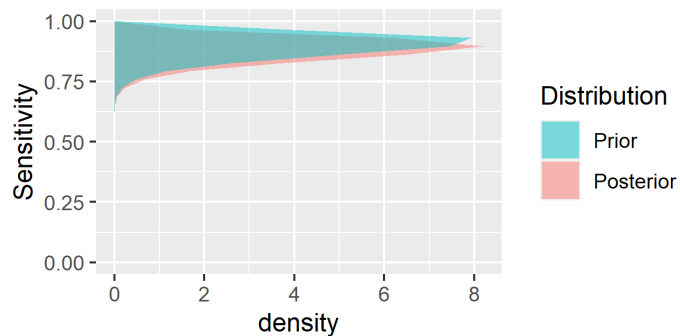

Bovigam OD 0.05 IFN

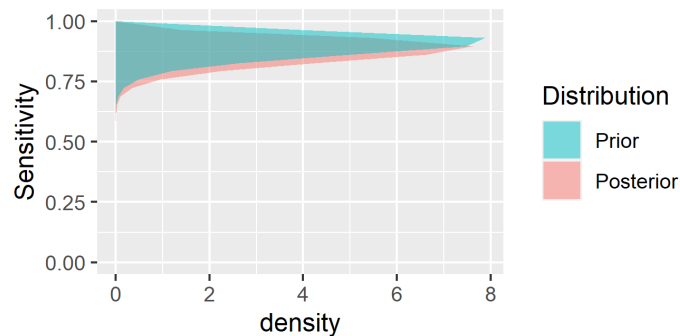

Bovigam OD 0.05 IFN

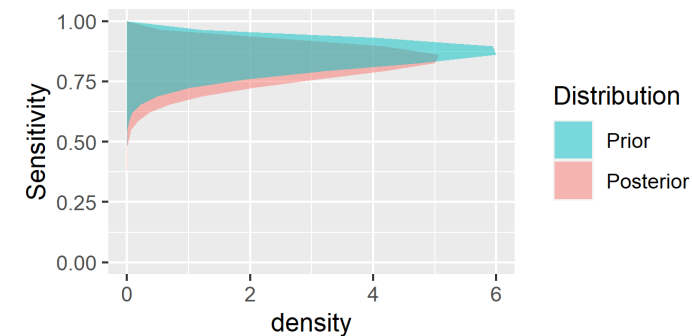

Bovigam OD 0.05 IFN

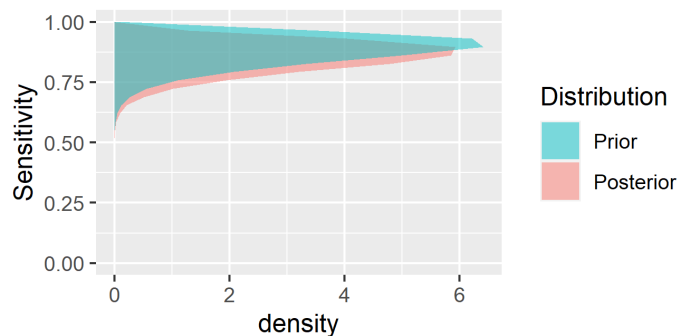

Bovigam OD 0.1 IFN

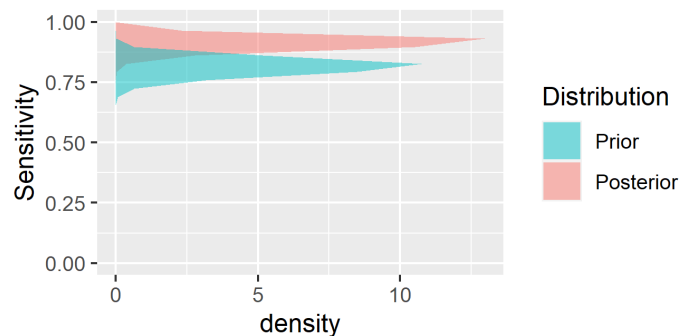

Bovigam OD 0.1 IFN

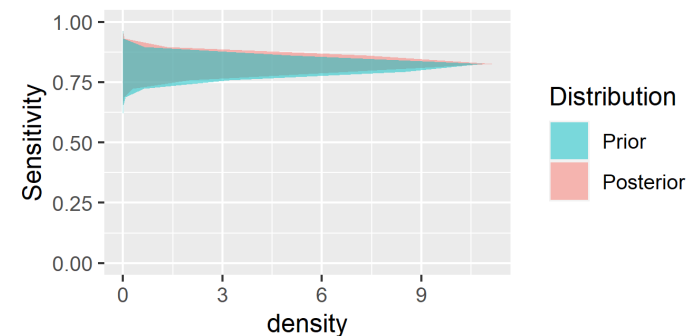

Bovigam OD 0.1 IFN

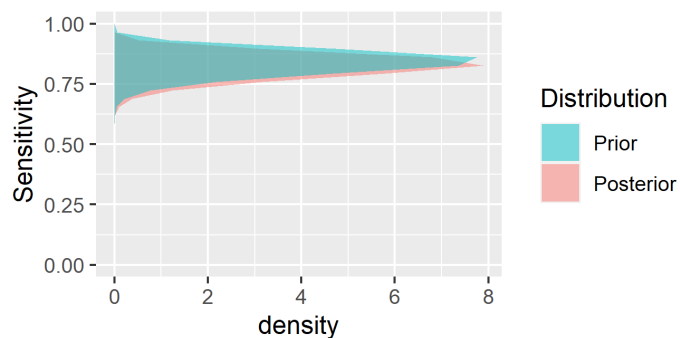

Bovigam OD 0.1 IFN

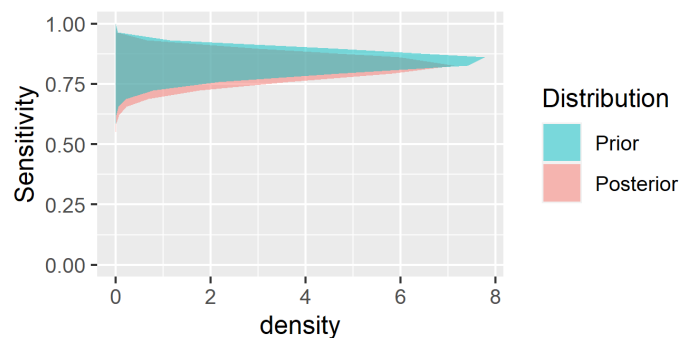

Bovigam OD 0.1 IFN

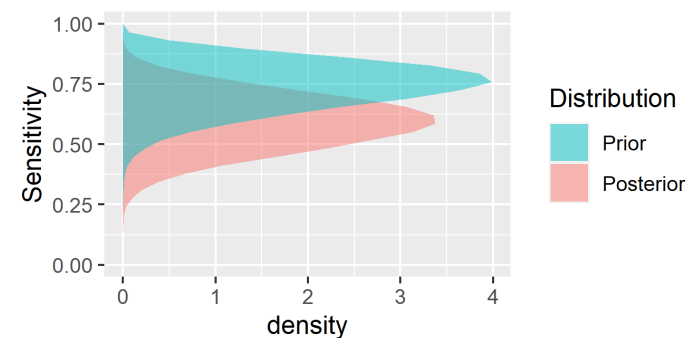

Bovigam OD 0.1 IFN

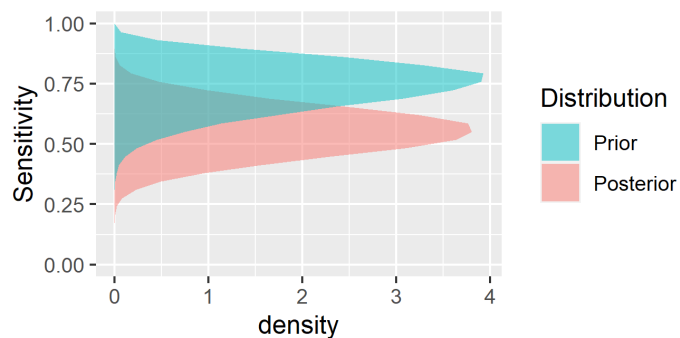

Bovigam OD 0.1 IFN

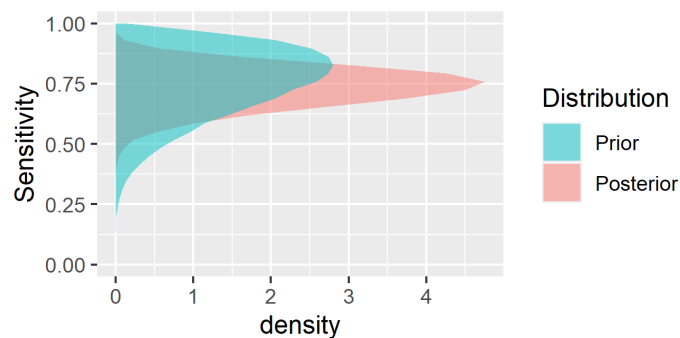

Bovigam OD 0.1 IFN

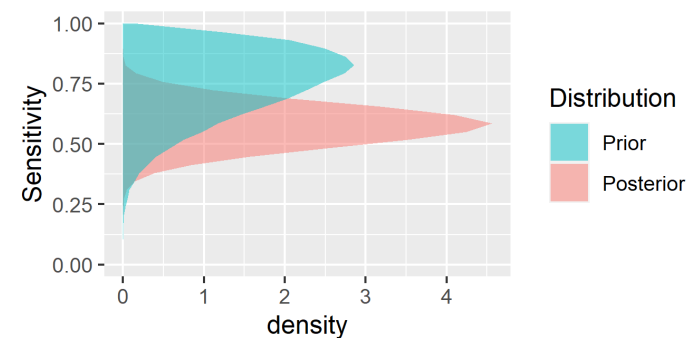

IDVet IFN

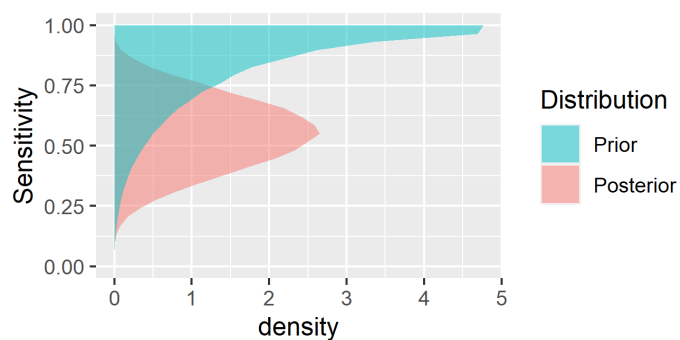

IDVet IFN

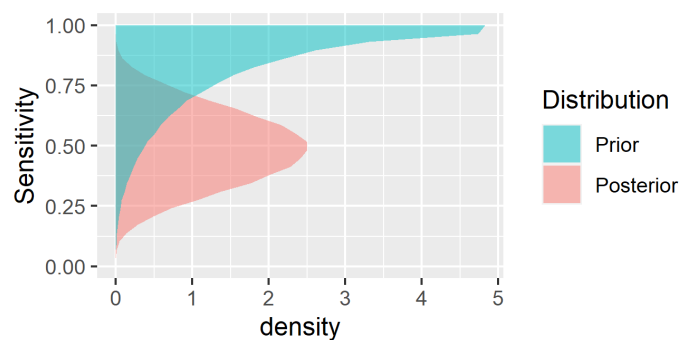

IDVet IFN

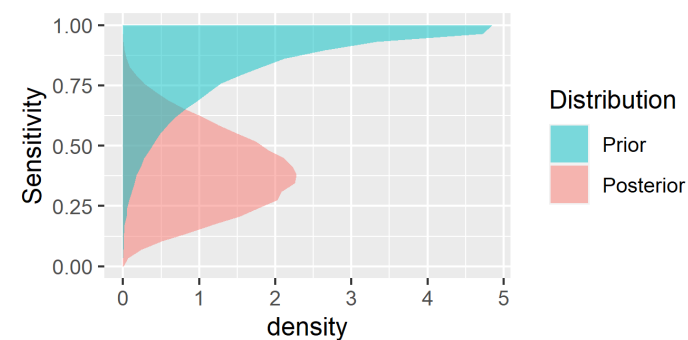

Severe CFT

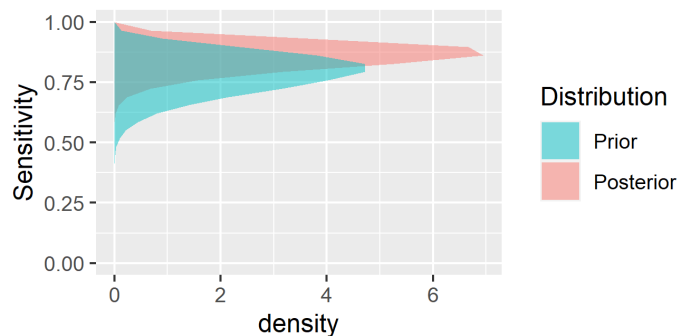

## Standard CFT

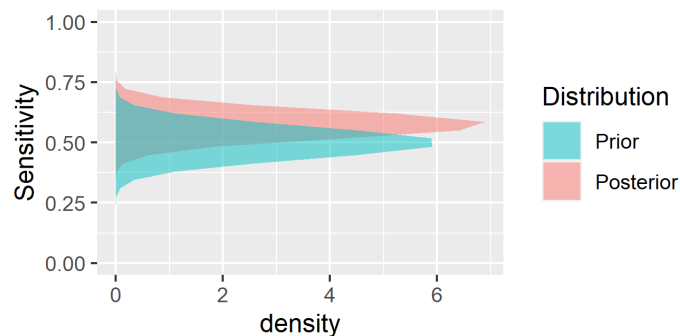

Standard CFT

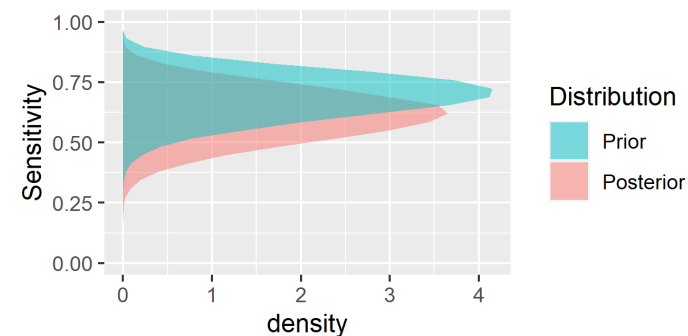

## Standard CFT

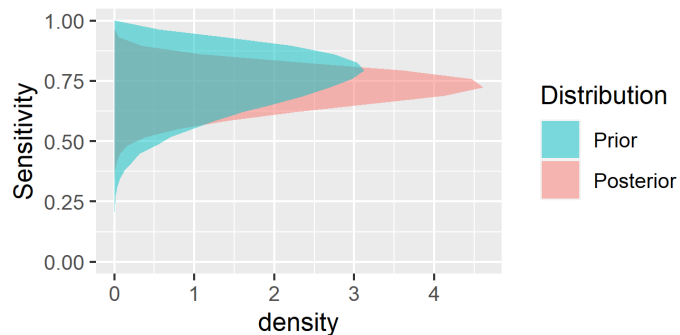

## Standard CFT

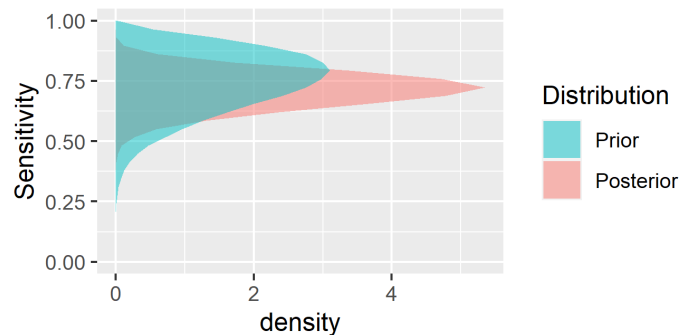

Standard CFT

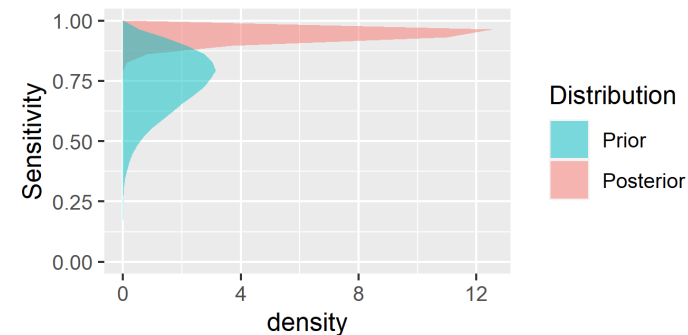

## Severe SICCT

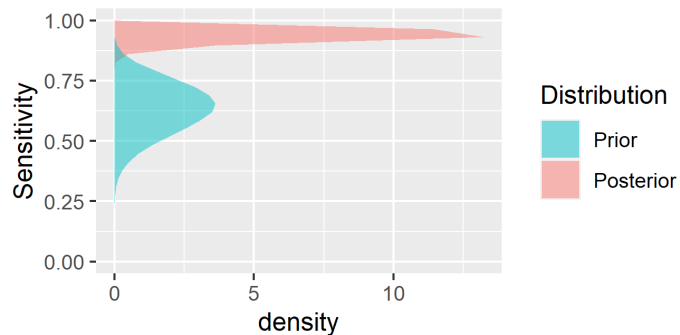

## Standard SICCT

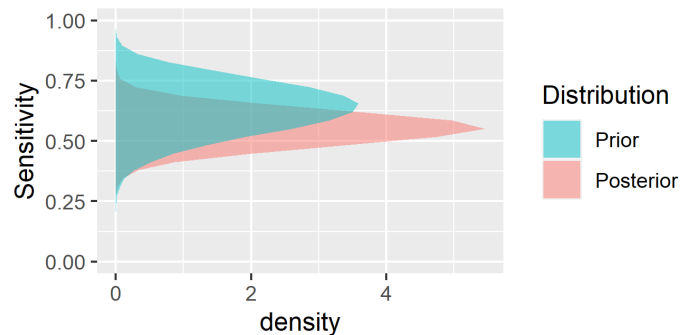

## Standard SICCT

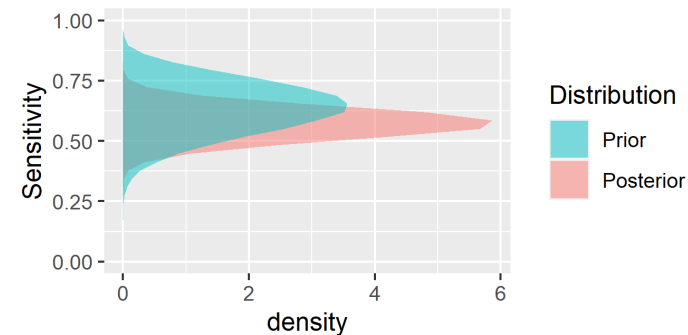

## Standard SICCT

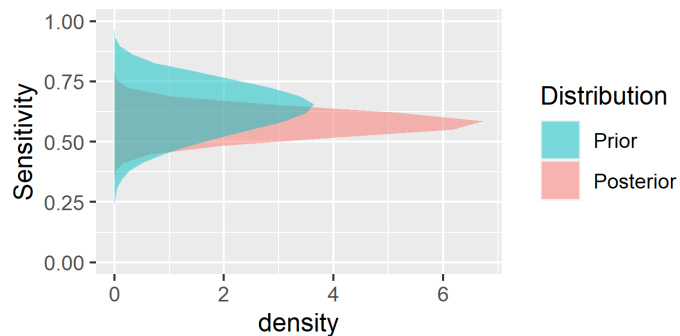

## Standard SICCT

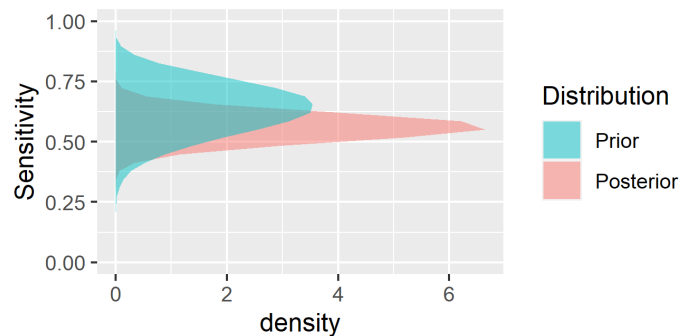

## Standard SICCT

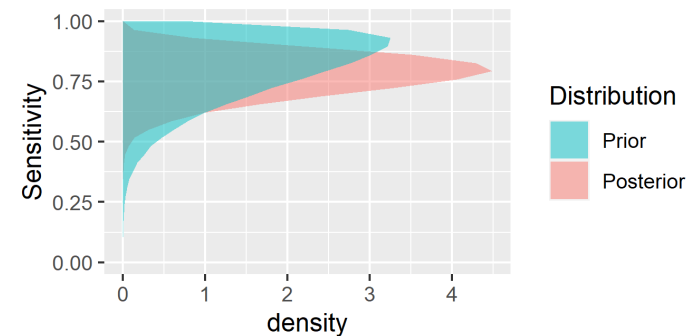



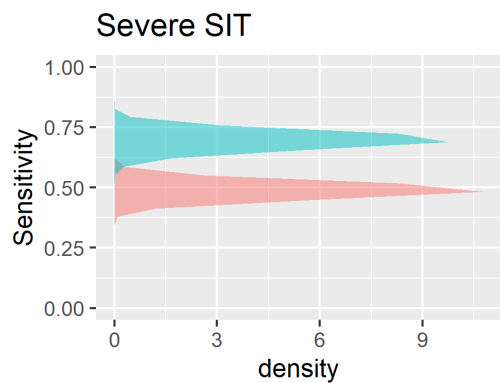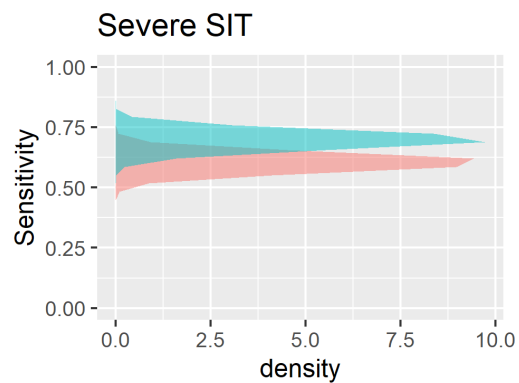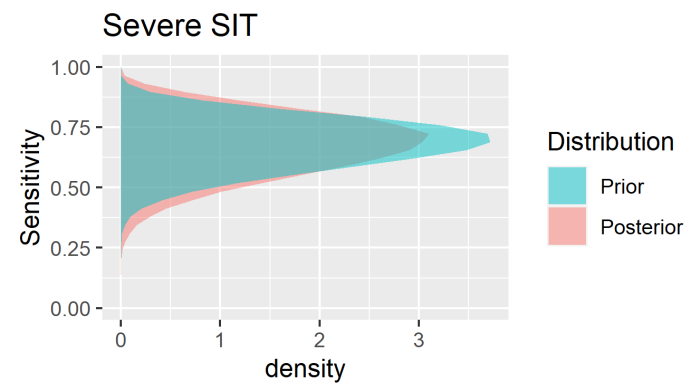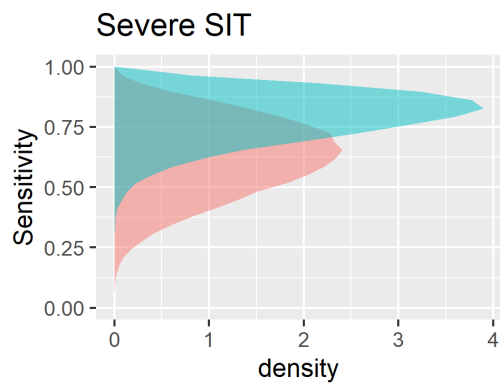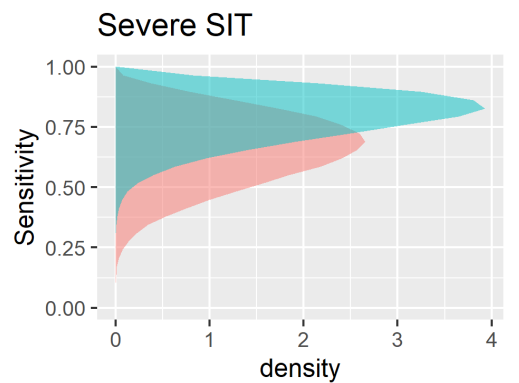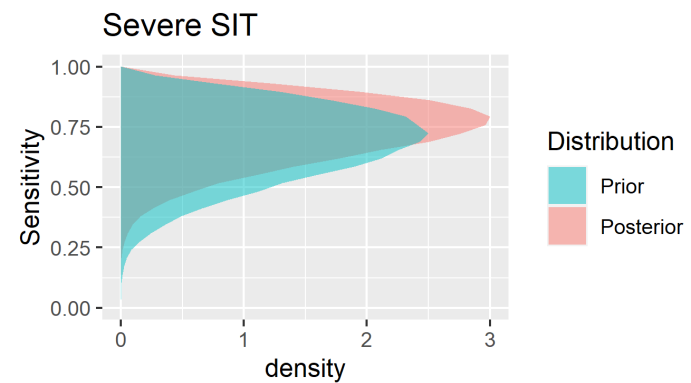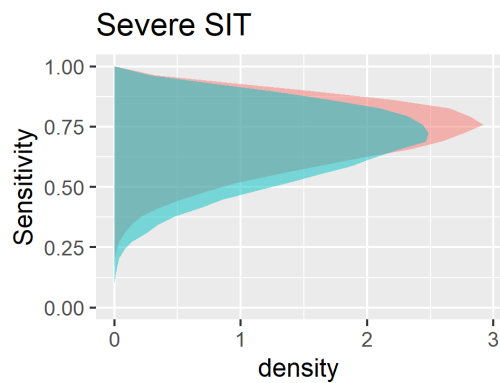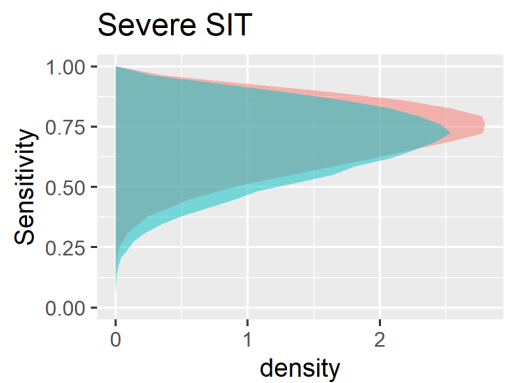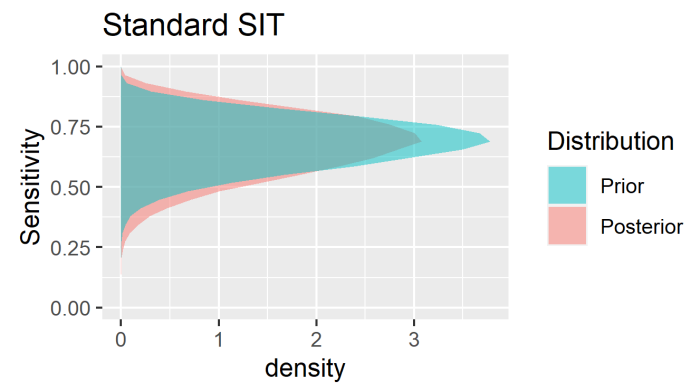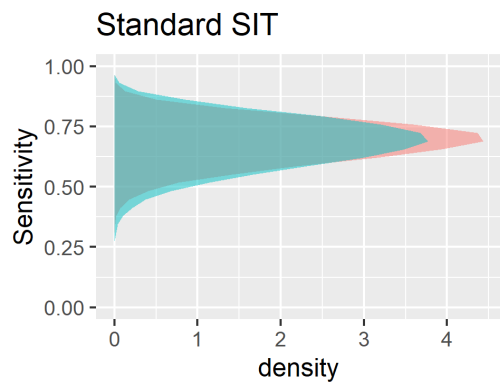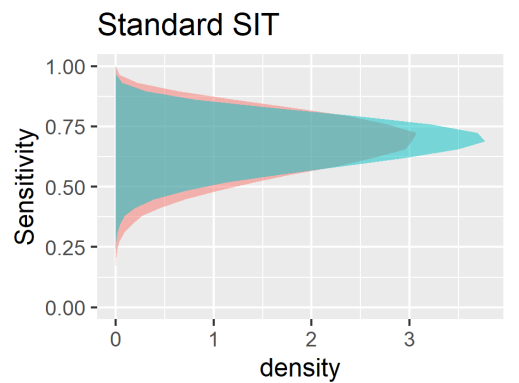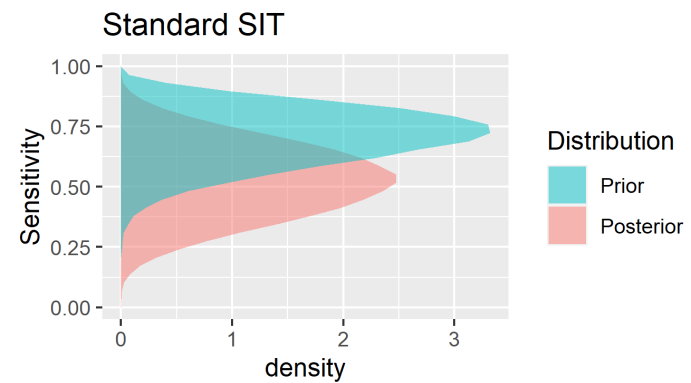

Standard SIT

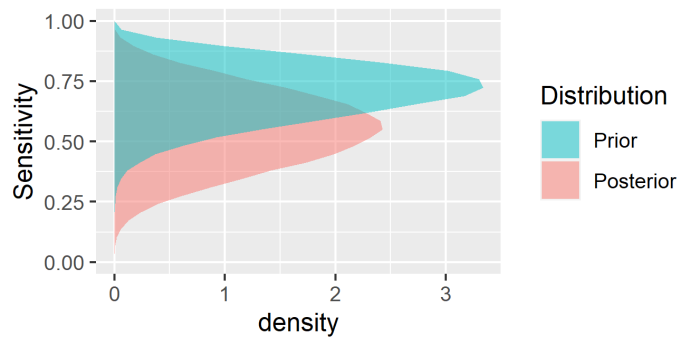

Standard SIT

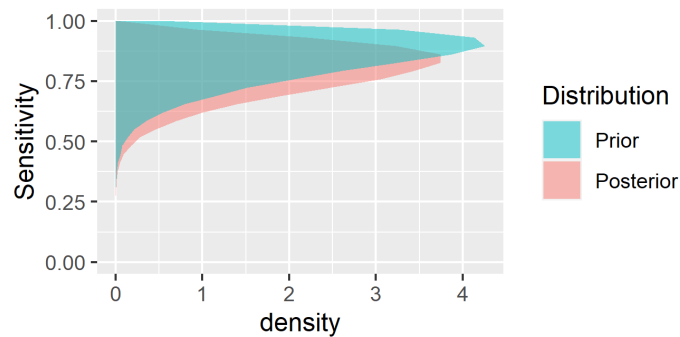

Standard SIT

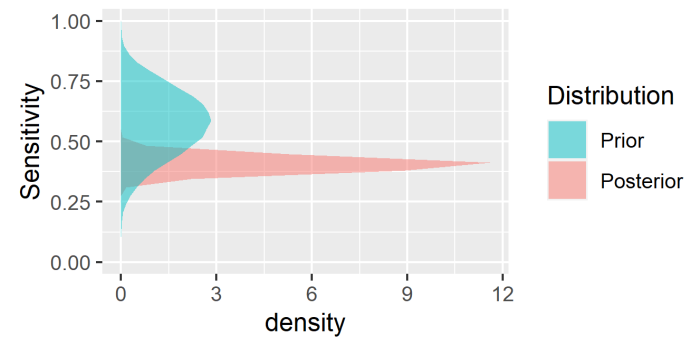

Standard SIT

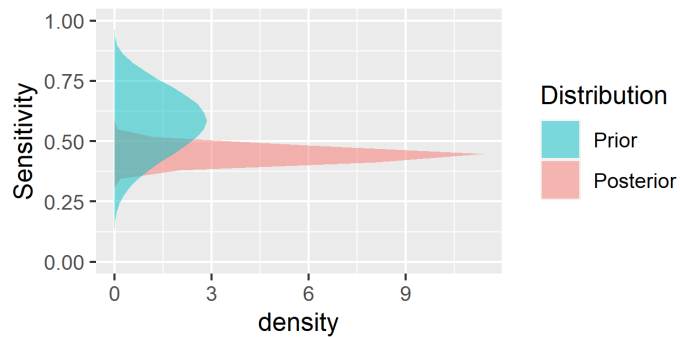

Standard SIT

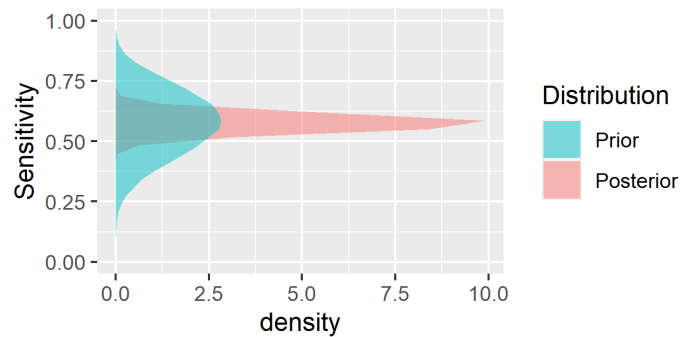

Standard SIT

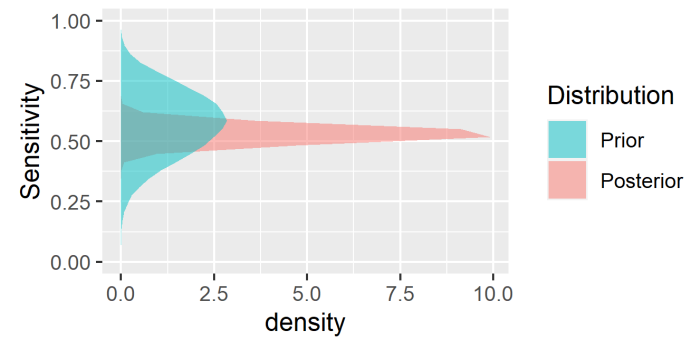

Standard SIT

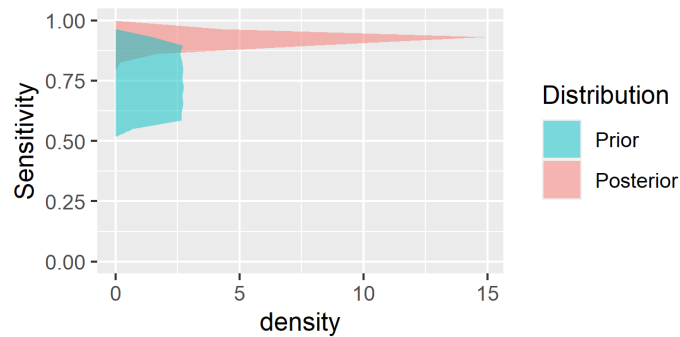

**Prior and posterior distributions of specificities of ante-mortem and post-mortem  
diagnostic tests for tuberculosis based on informative priors**

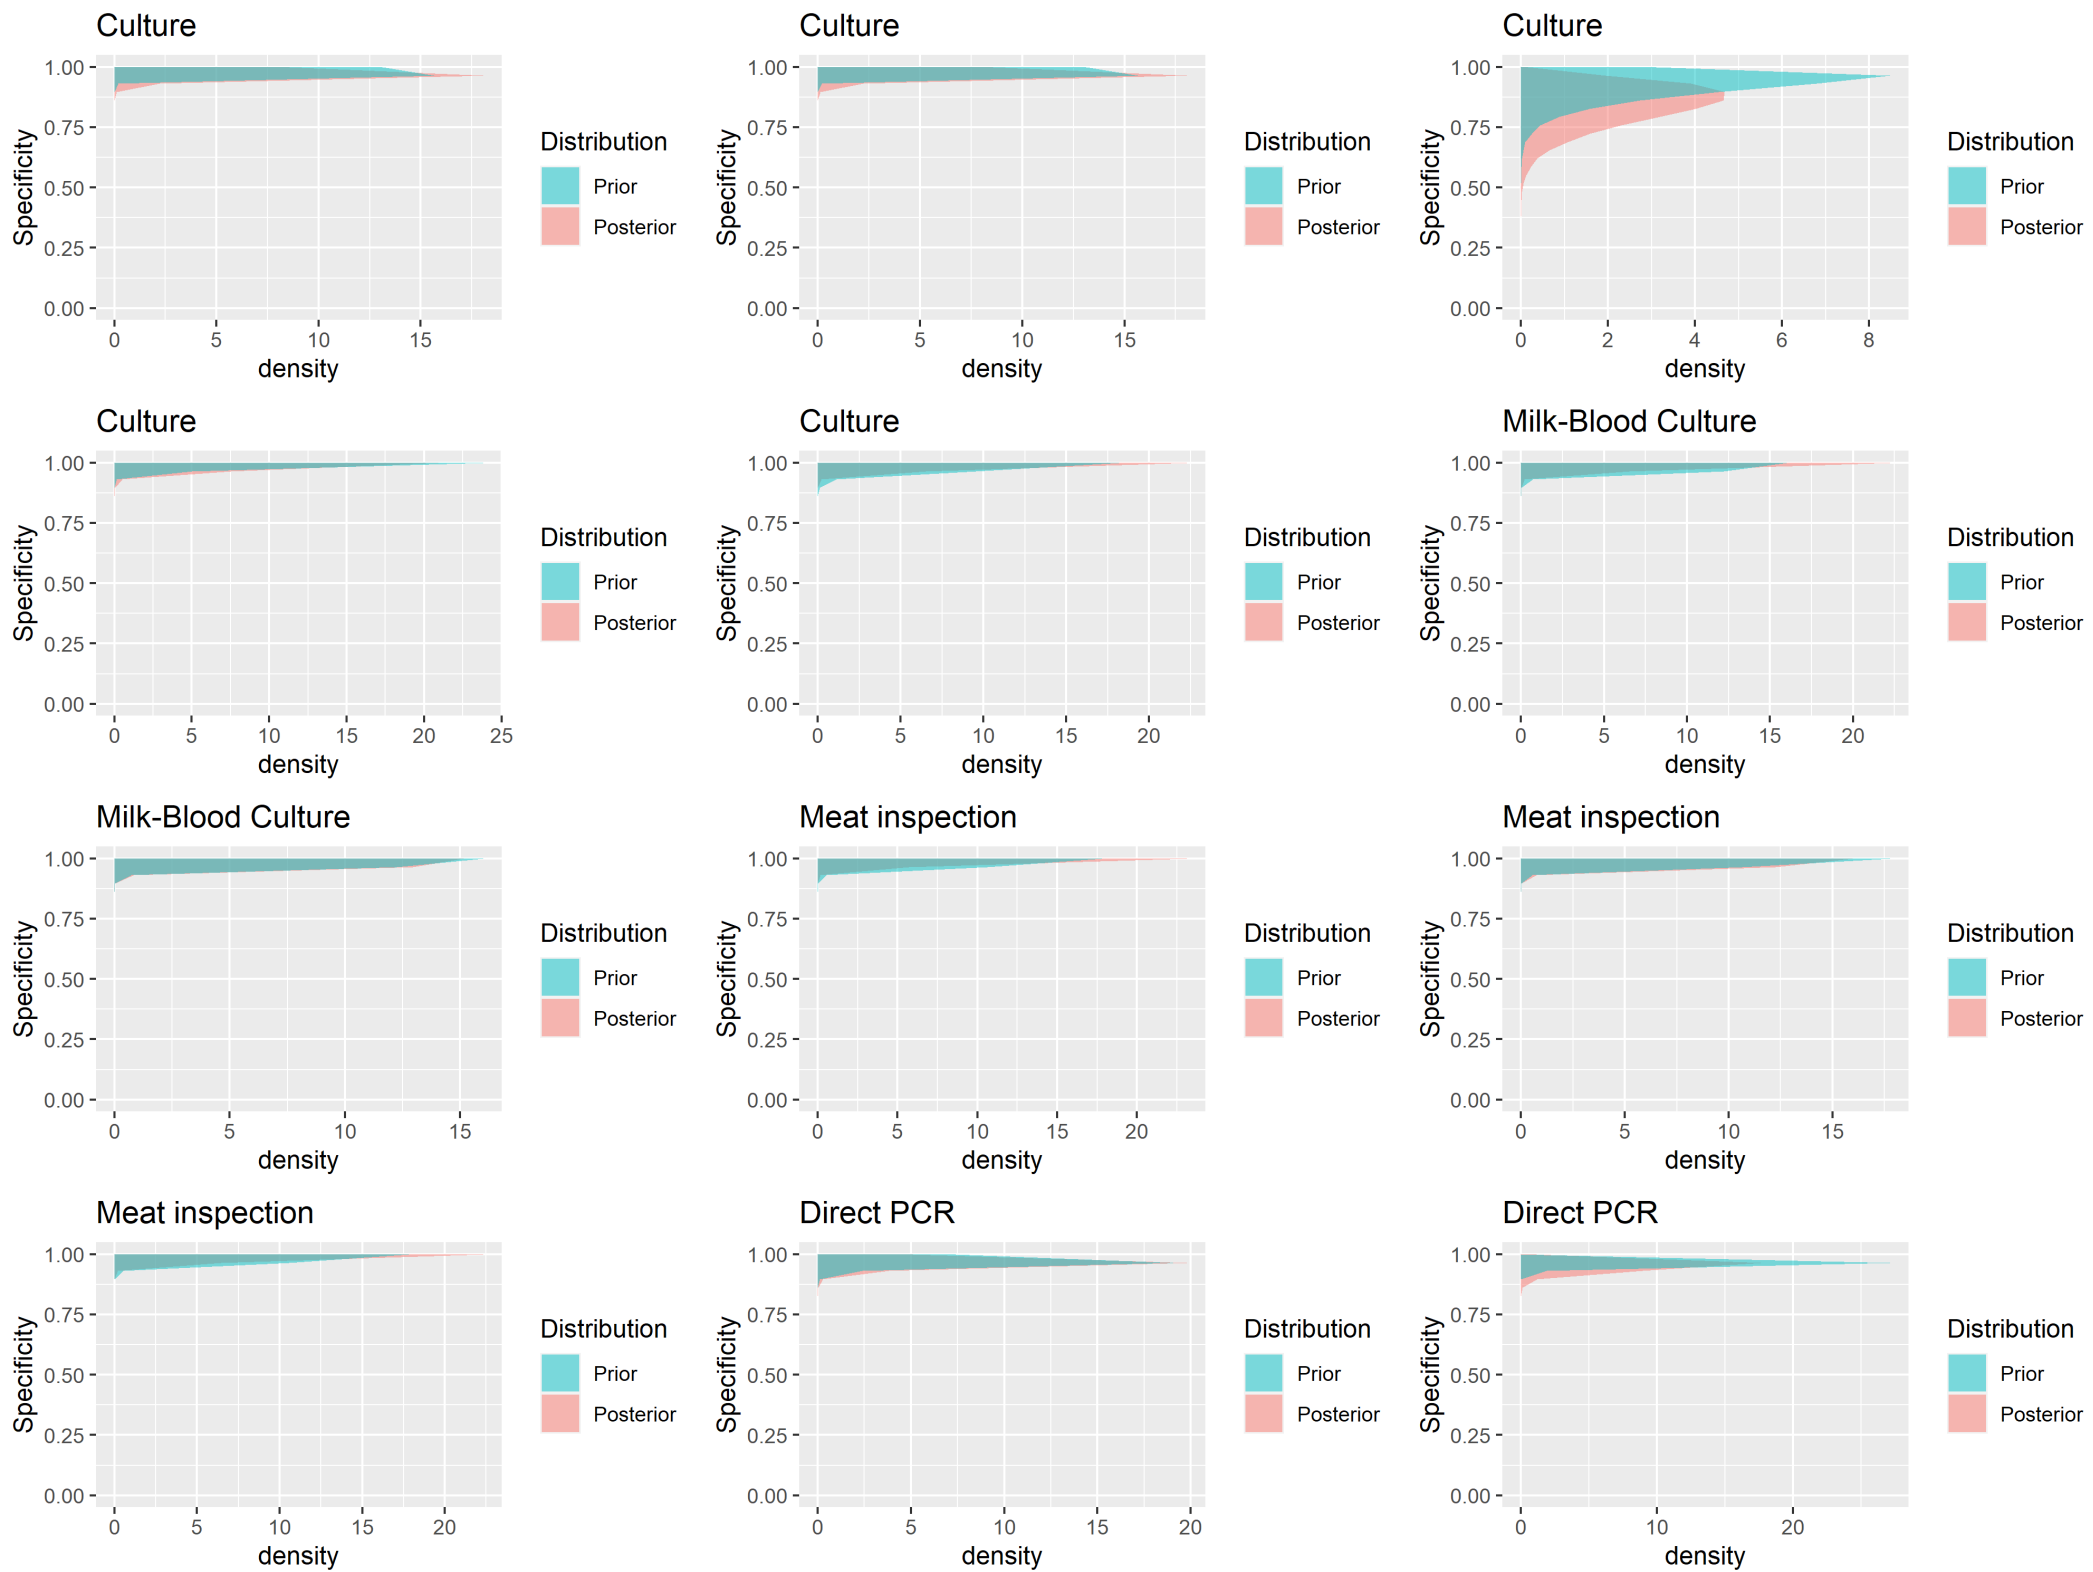

Direct PCR

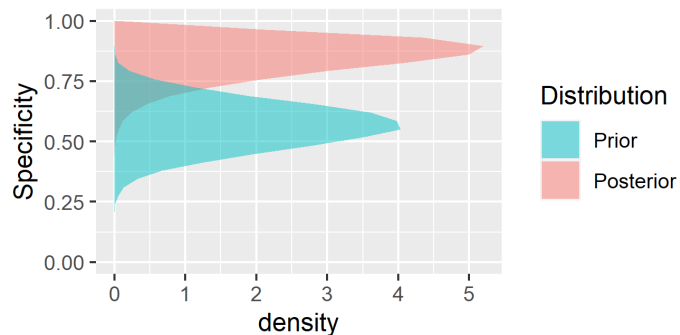

Direct PCR

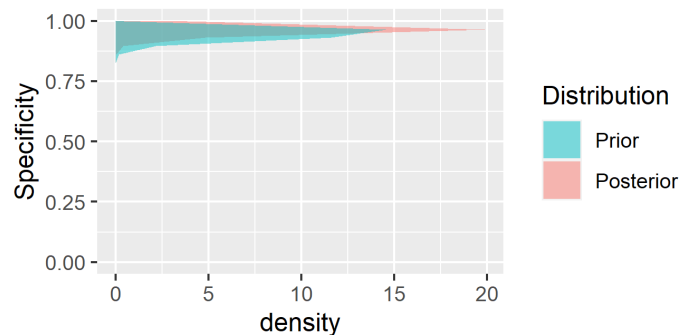

Body Fluid Direct PCR

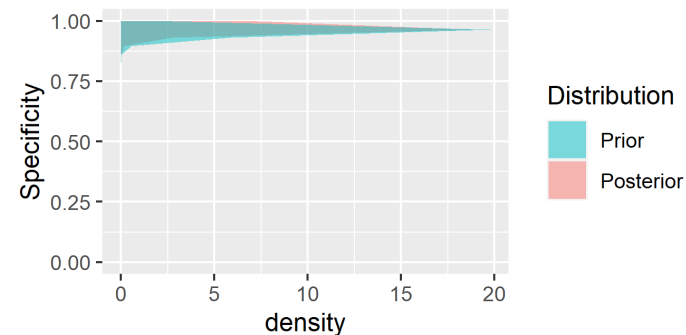

Body Fluid Direct PCR

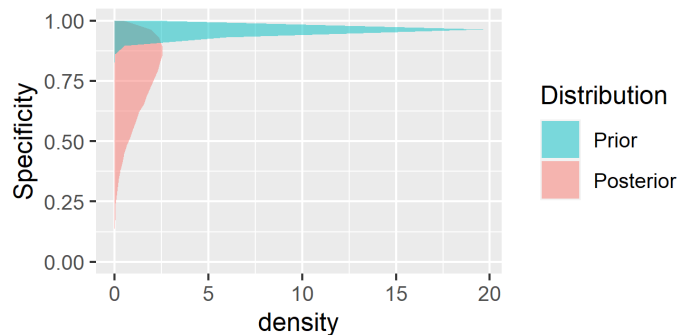

Serology

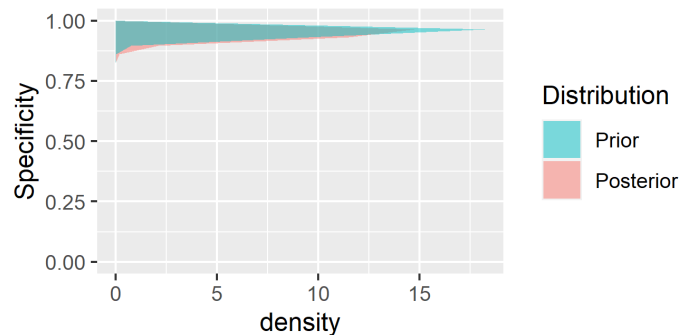

Serology

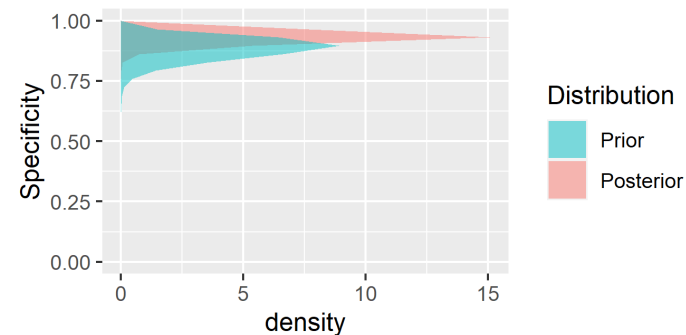

Serology

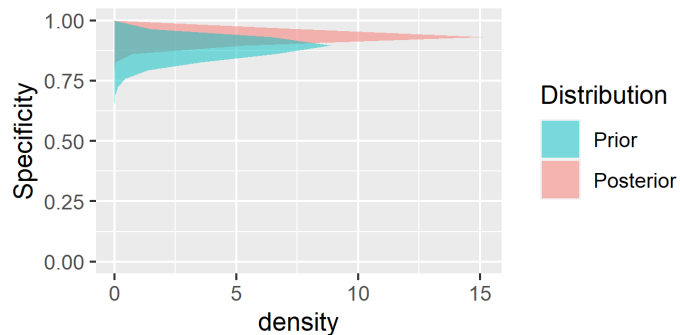

Serology

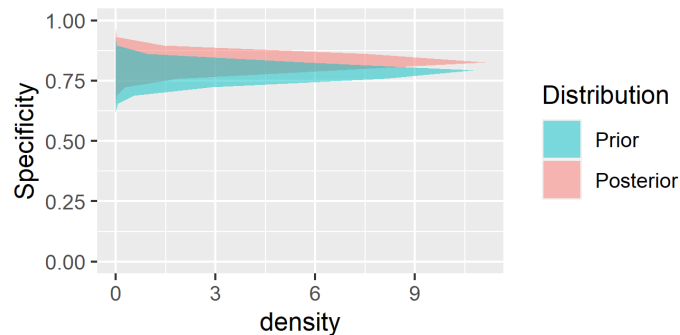

Serology

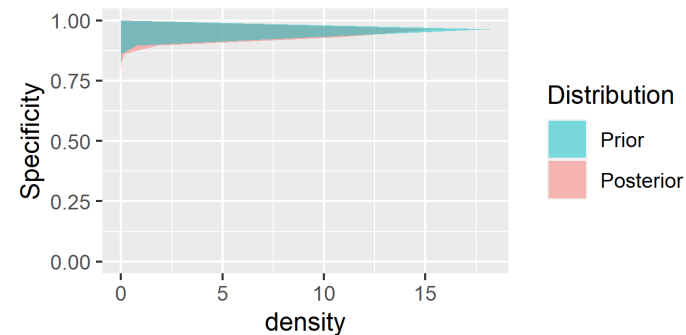

Serology

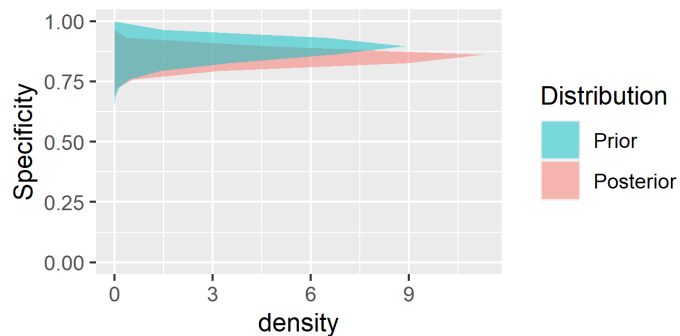

Serology

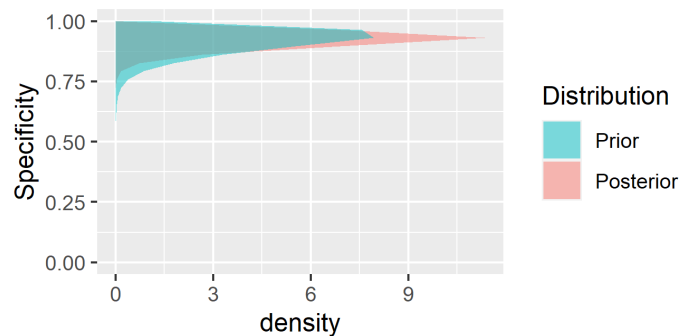

Serology

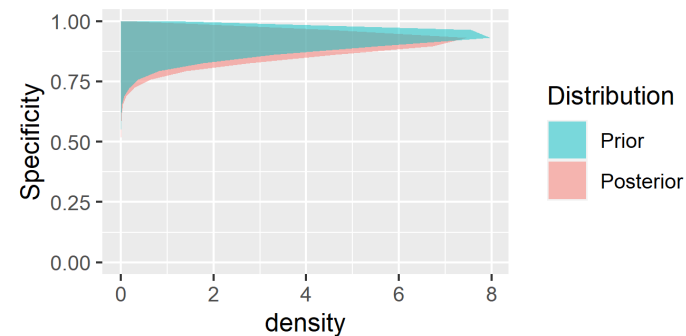

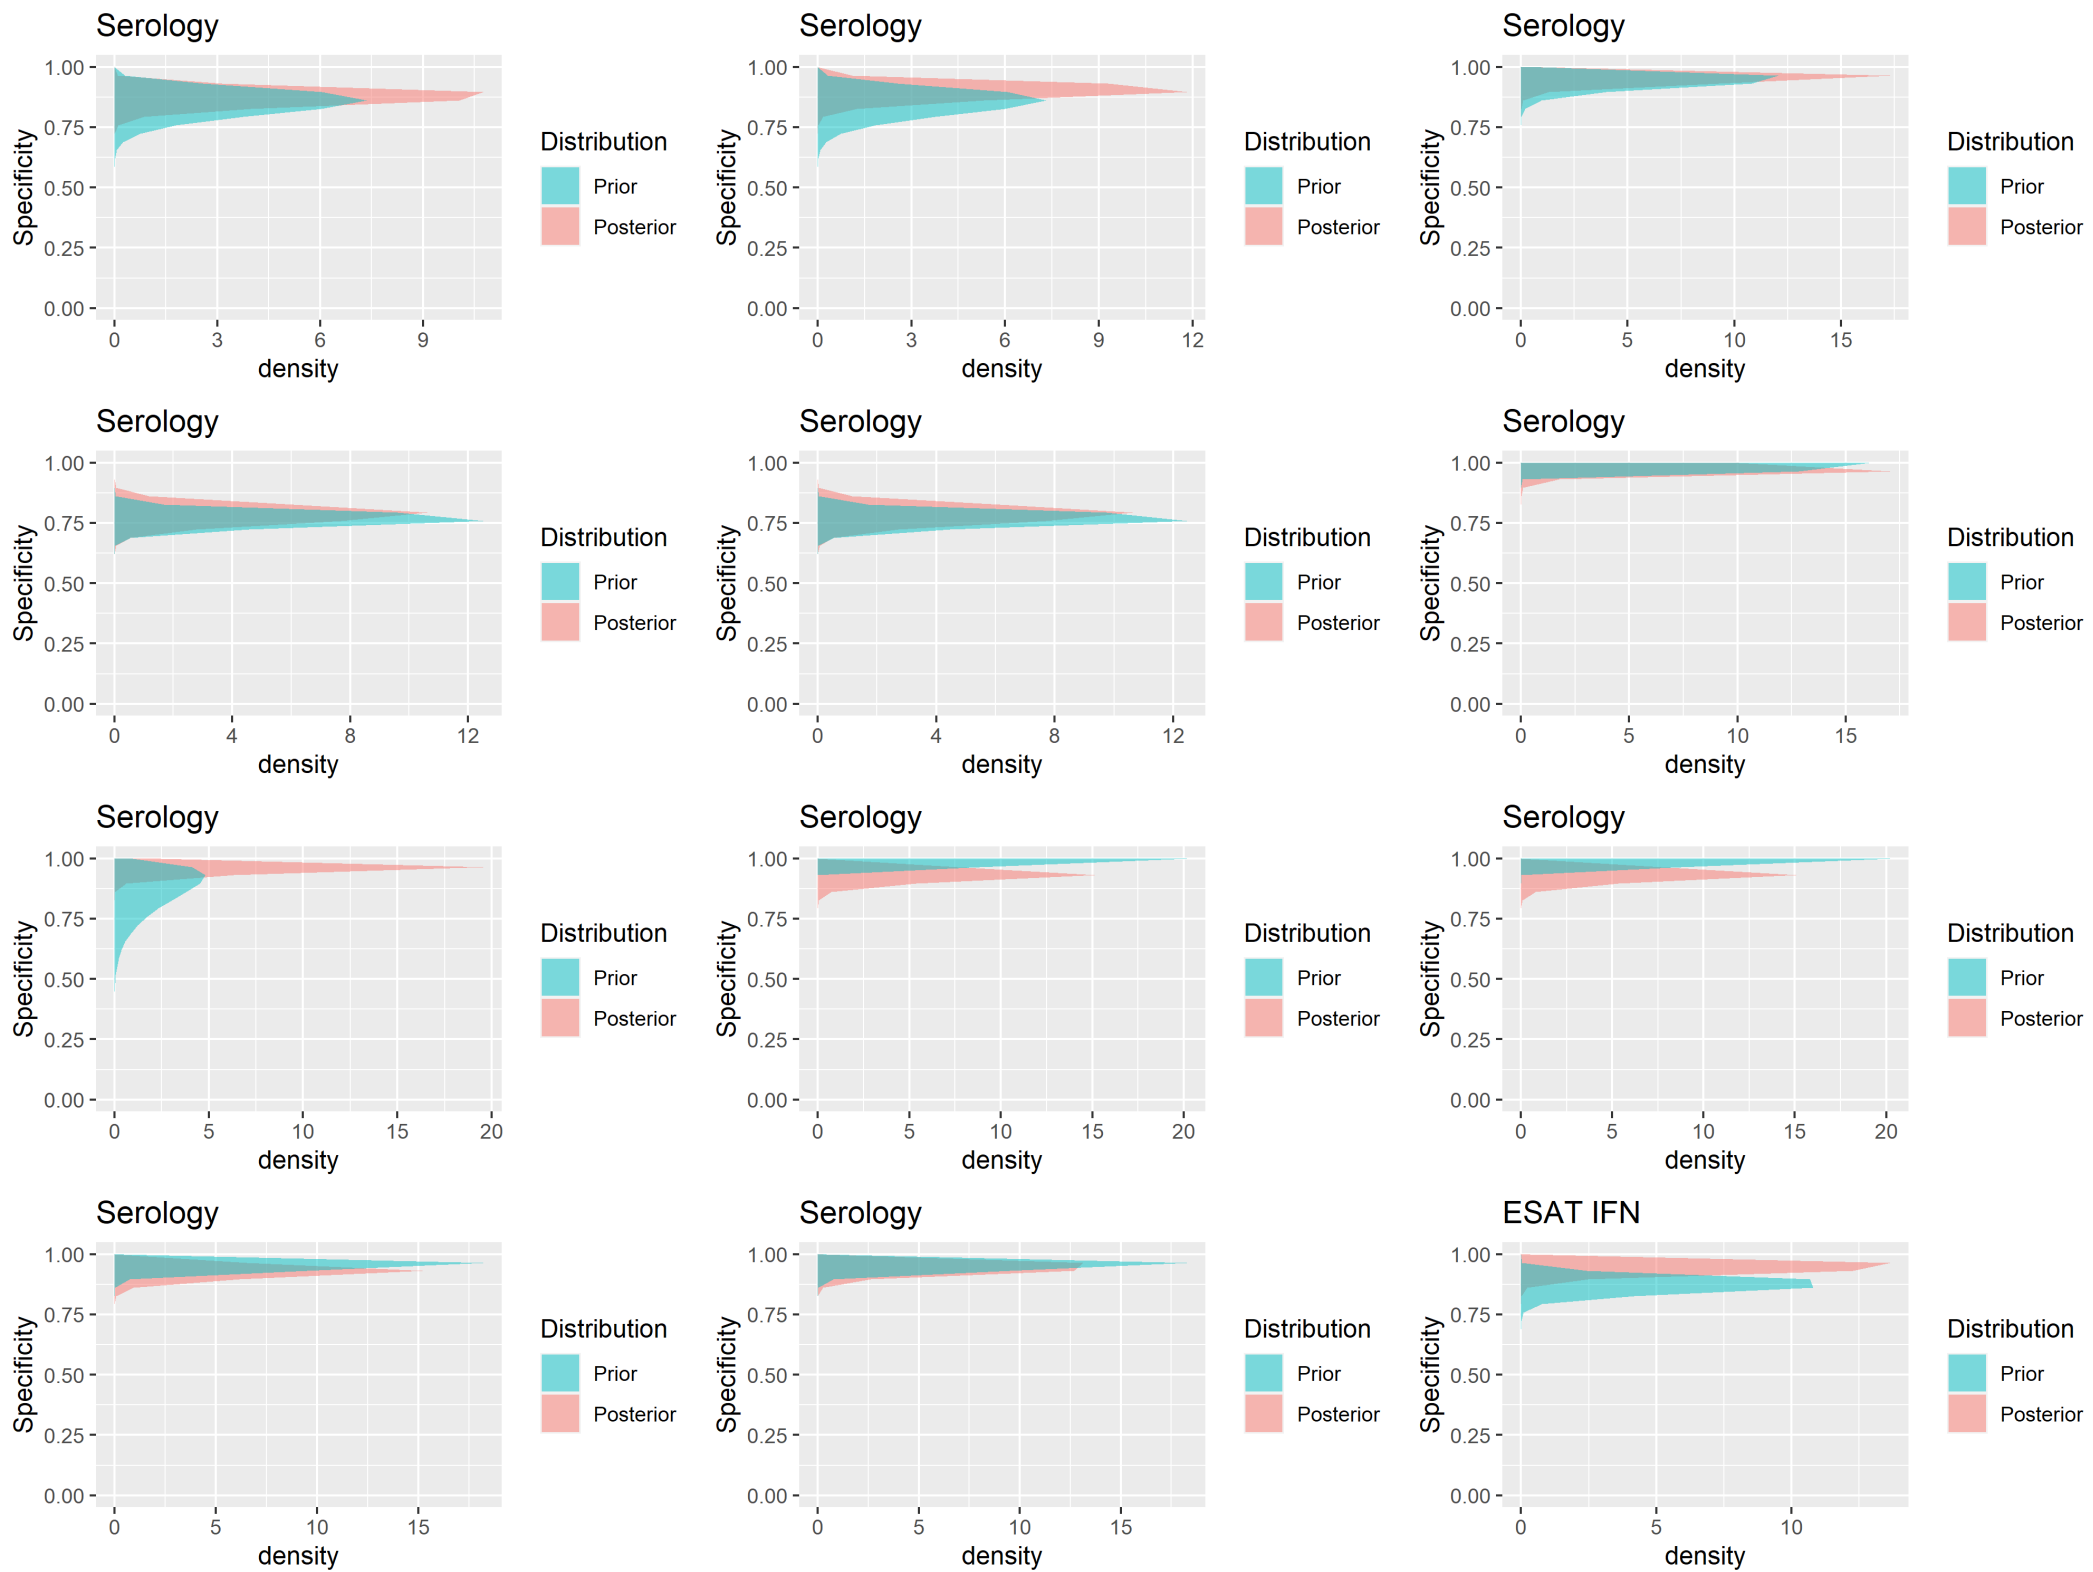

ESAT IFN

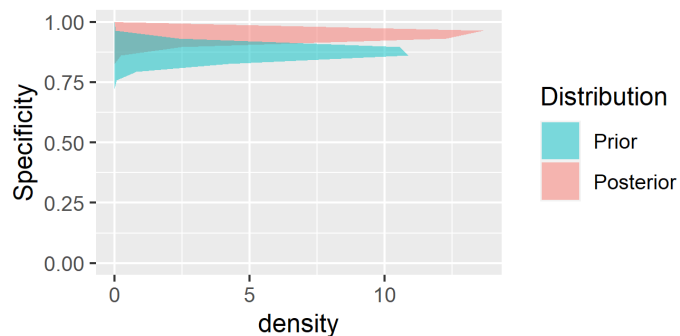

ESAT IFN

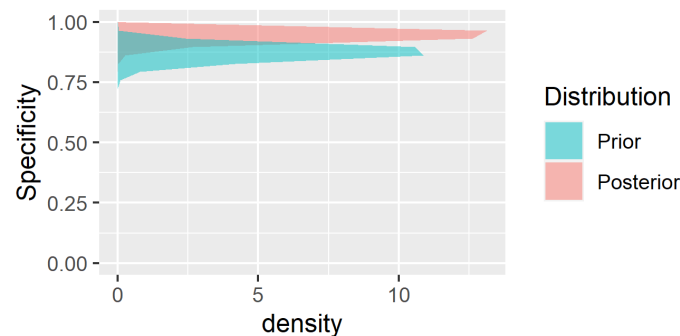

ESAT IFN

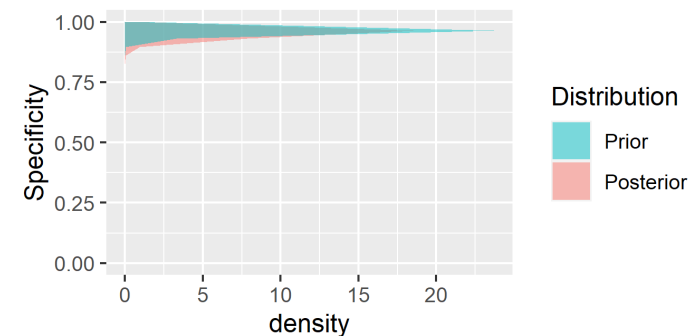

ESAT IFN

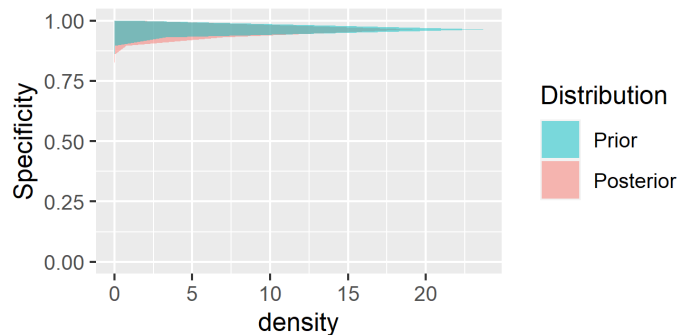

In-house IFN

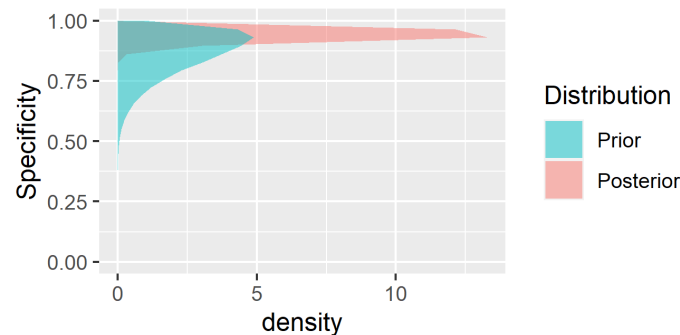

Bovigam OD 0.05 IFN

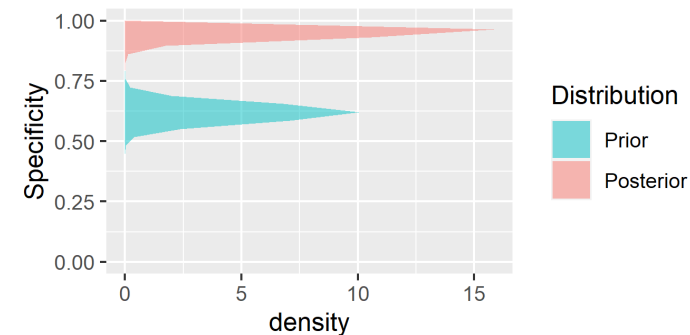

Bovigam OD 0.05 IFN

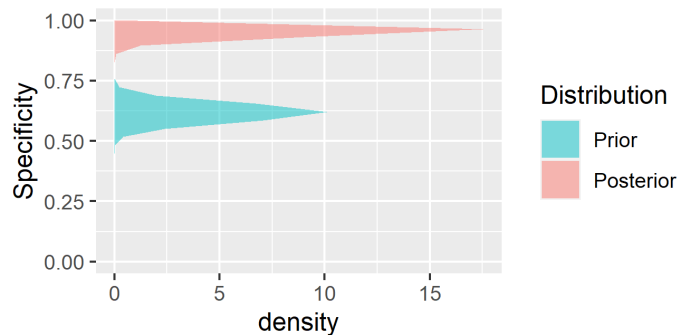

Bovigam OD 0.05 IFN

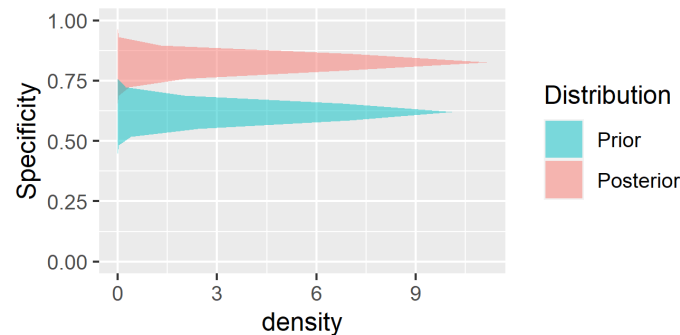

Bovigam OD 0.05 IFN

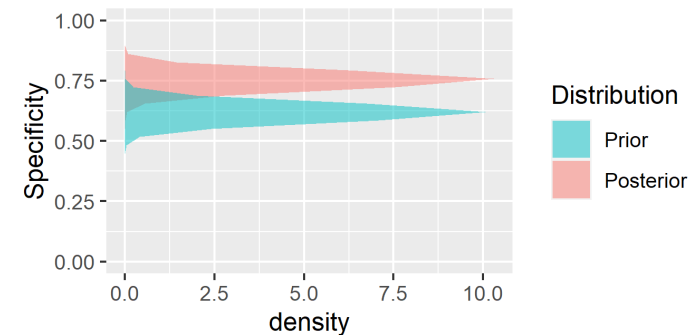

Bovigam OD 0.05 IFN

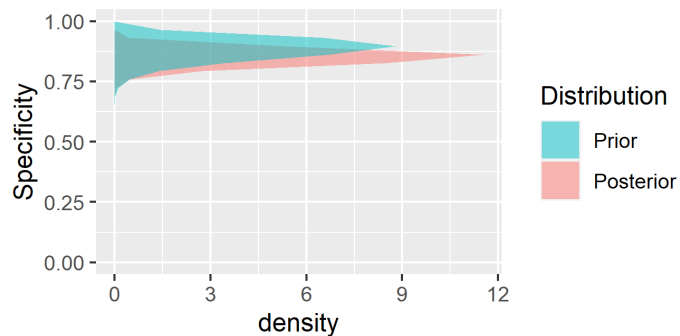

Bovigam OD 0.05 IFN

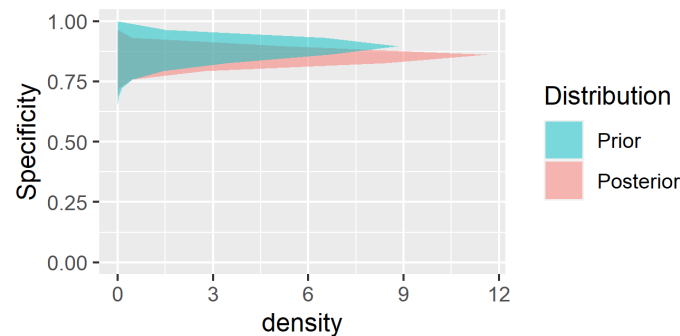

Bovigam OD 0.05 IFN

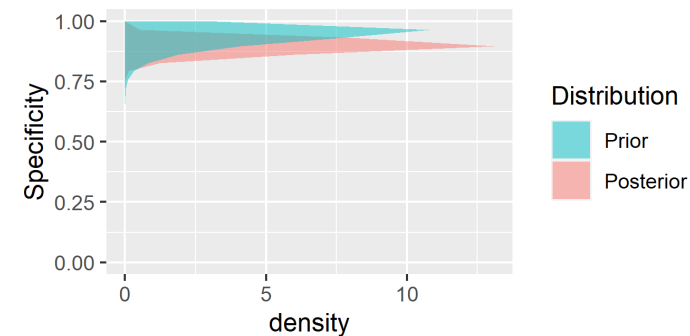

Bovigam OD 0.05 IFN

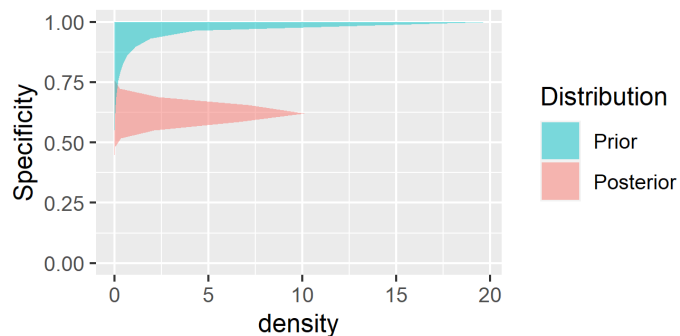

Bovigam OD 0.1 IFN

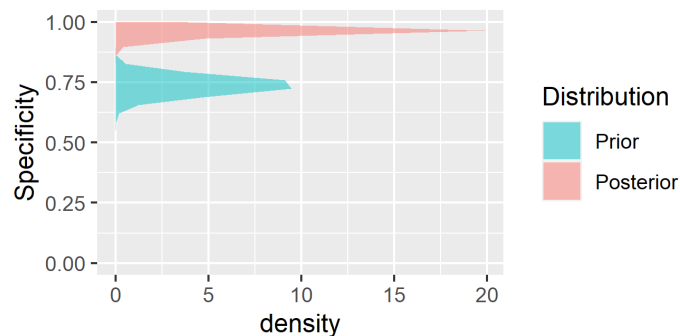

Bovigam OD 0.1 IFN

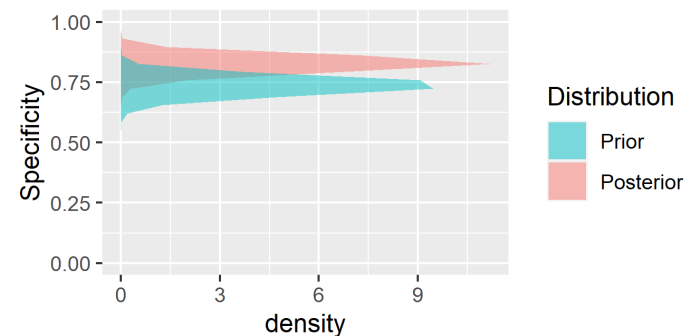

Bovigam OD 0.1 IFN

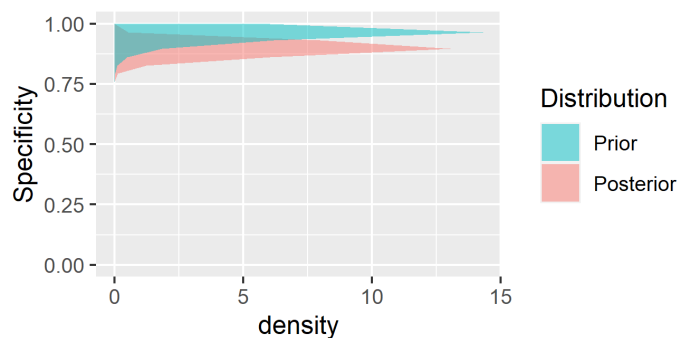

Bovigam OD 0.1 IFN

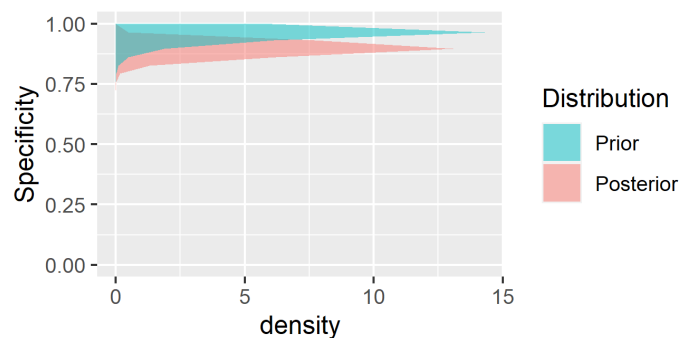

Bovigam OD 0.1 IFN

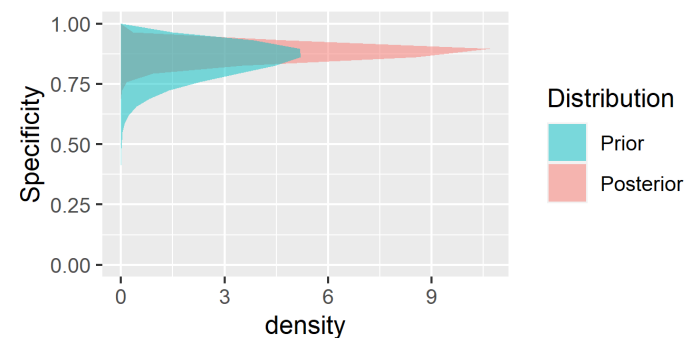

Bovigam OD 0.1 IFN

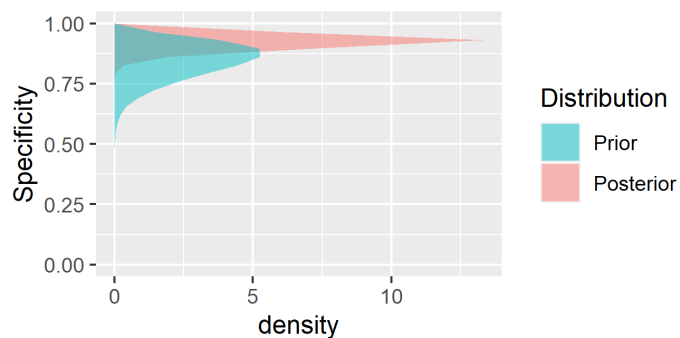

Bovigam OD 0.1 IFN

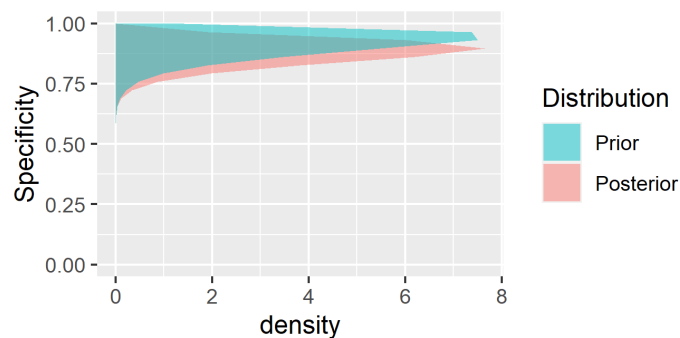

Bovigam OD 0.1 IFN

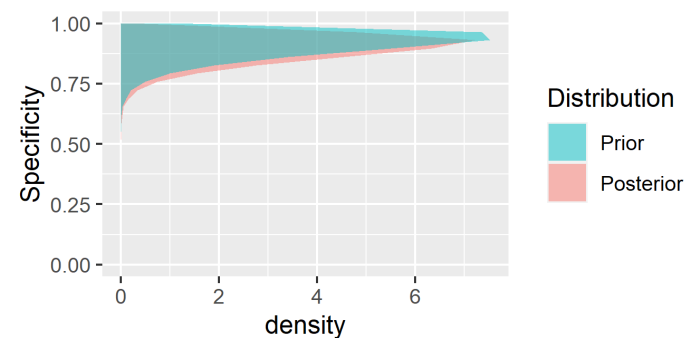

IDVet IFN

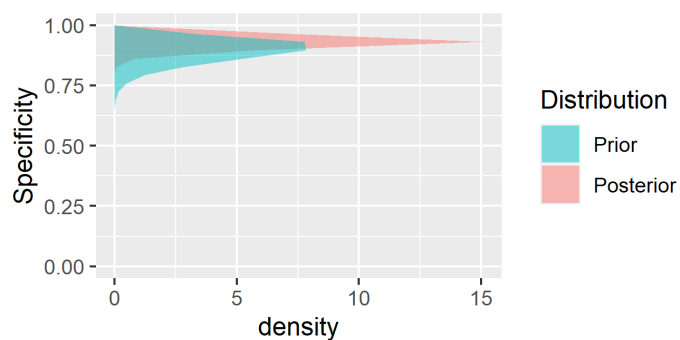

IDVet IFN

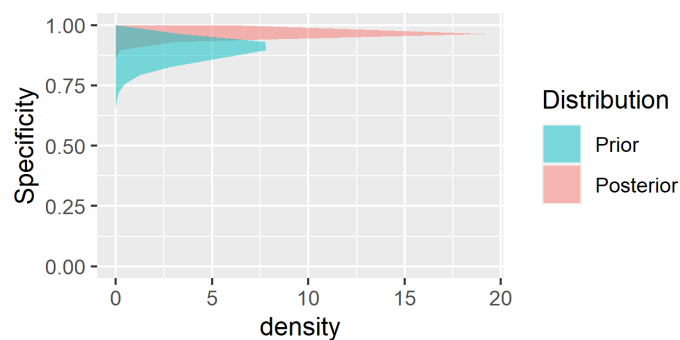

IDVet IFN

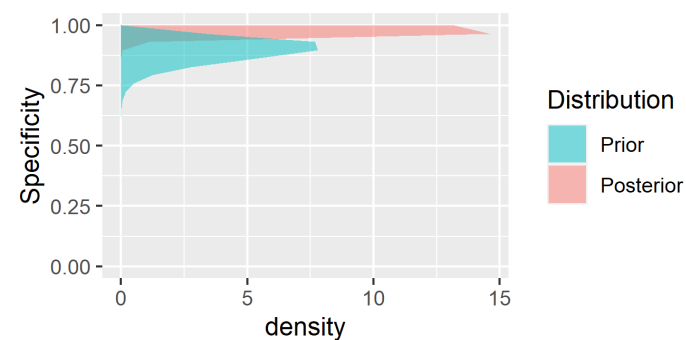



## Severe CFT

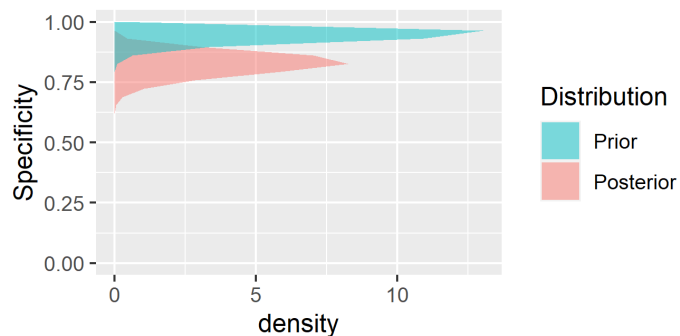

## Standard CFT

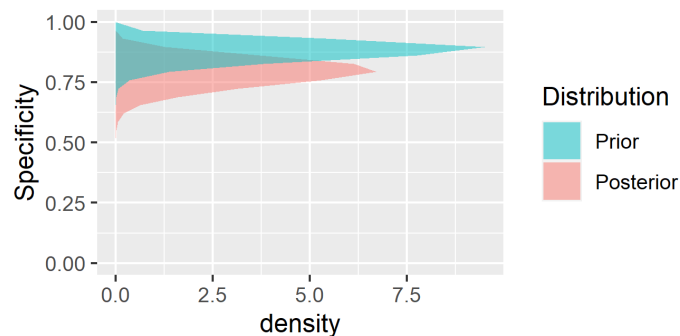

Standard CFT

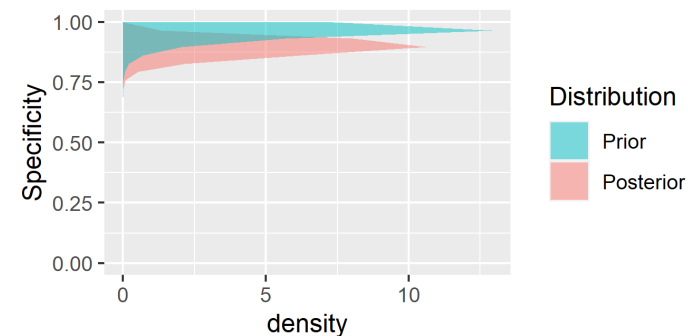

### Standard CFT

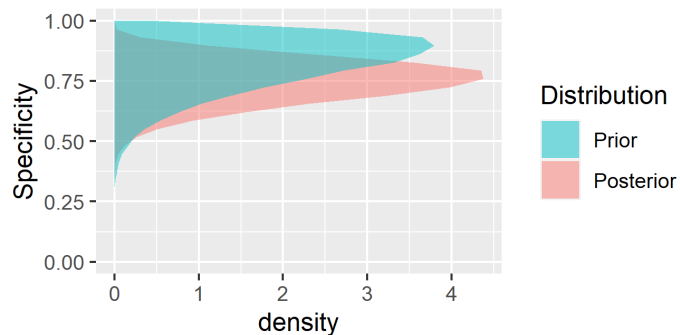

## Standard CFT

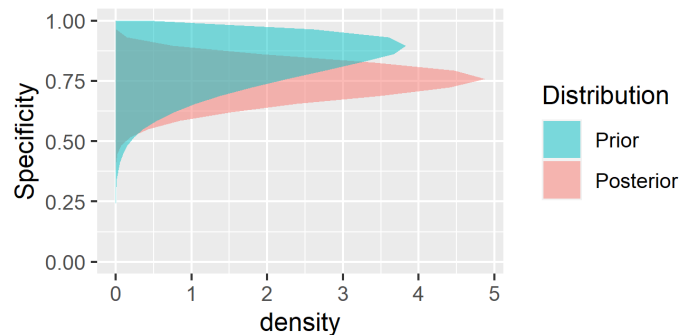

Standard CFT

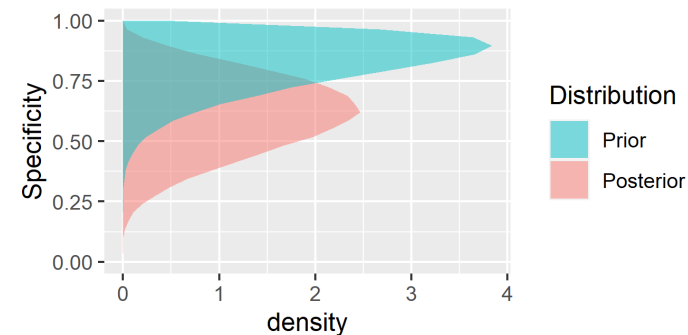

## Severe SICCT

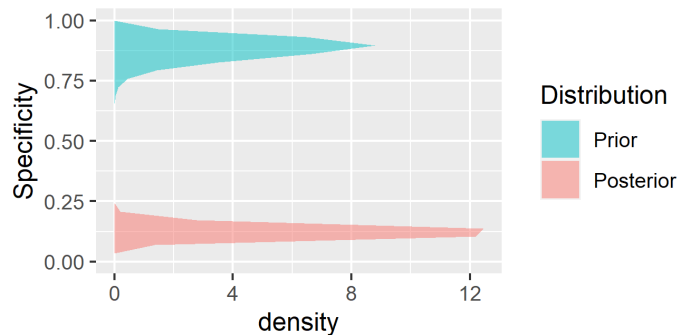

## Standard SICCT

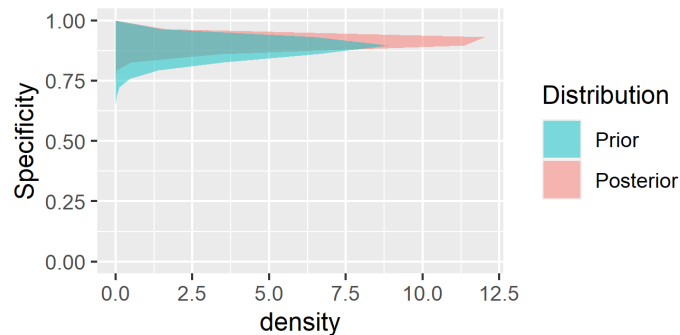

## Standard SICCT

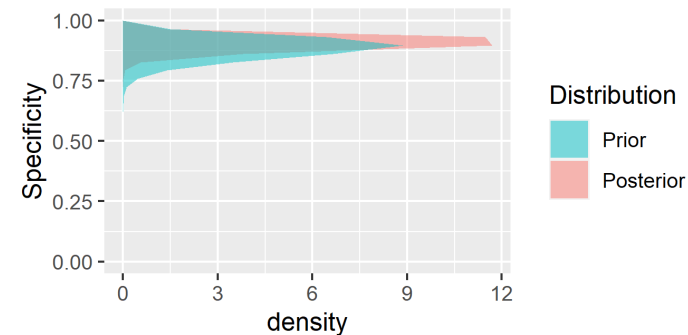

## Standard SICCT

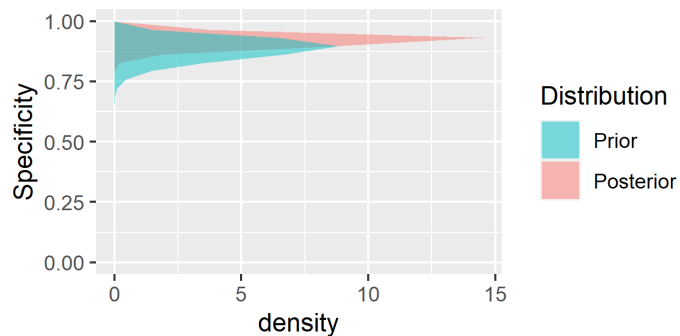

## Standard SICCT

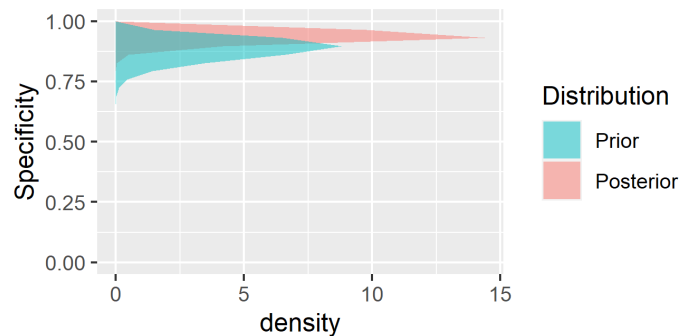

## Standard SICCT

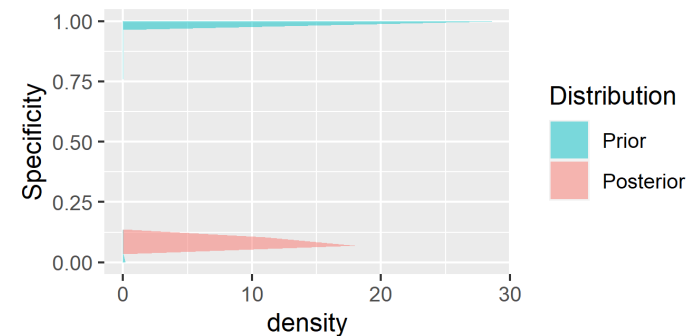

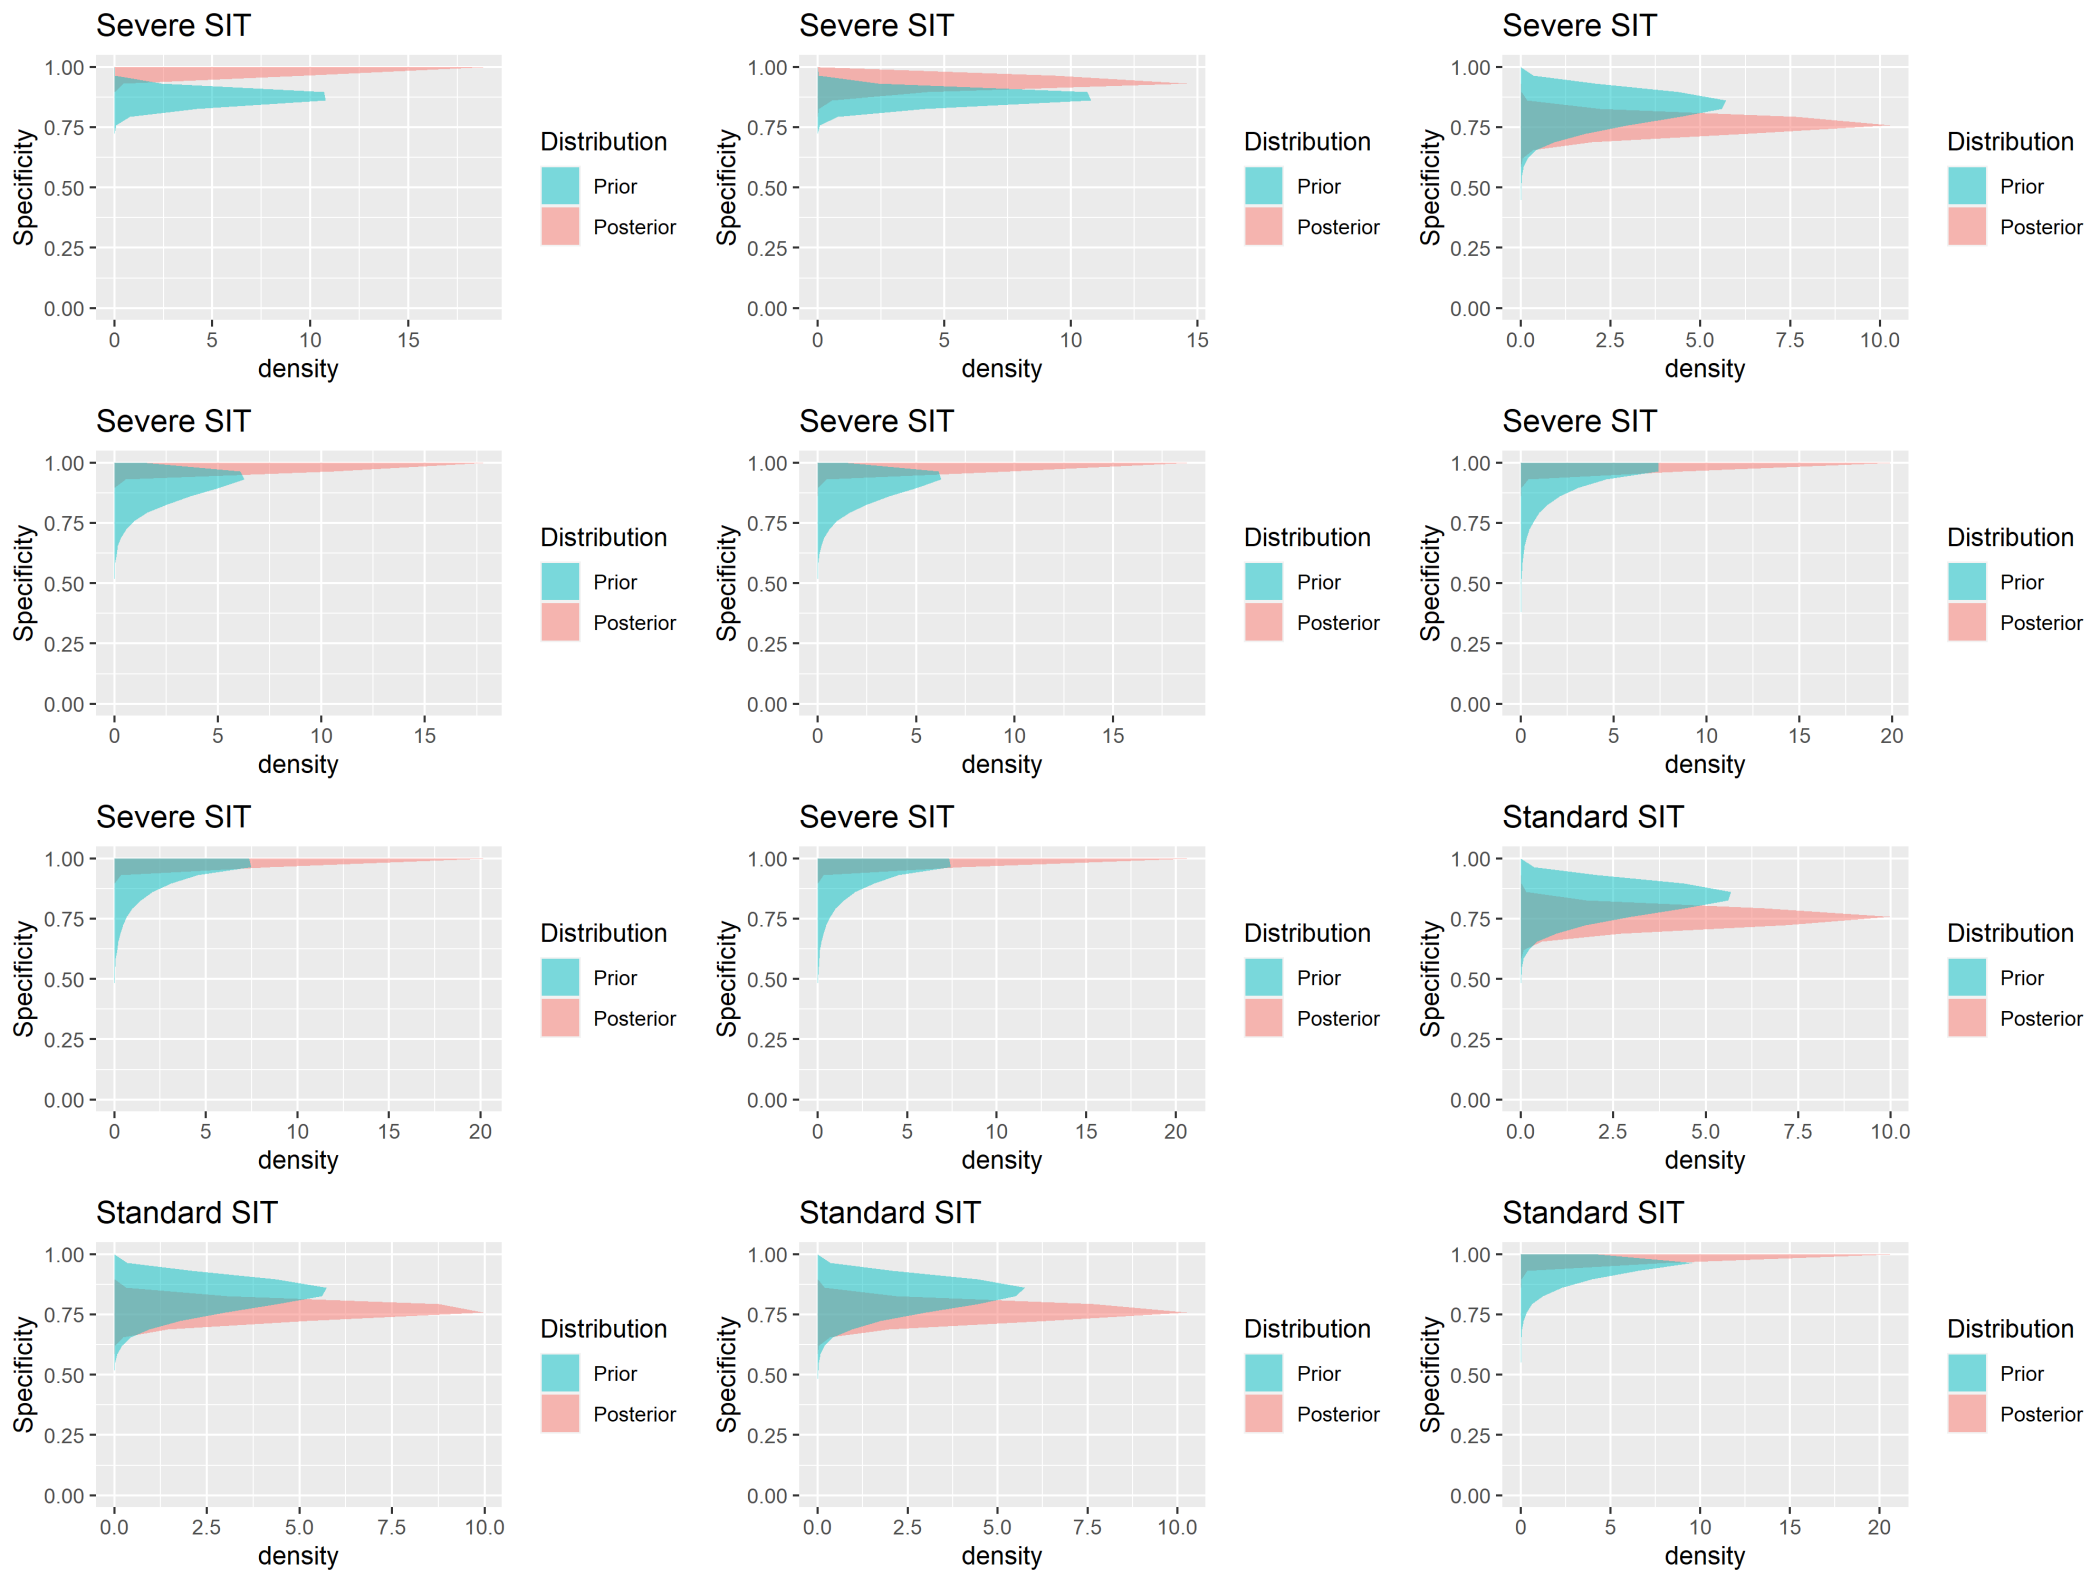

Standard SIT

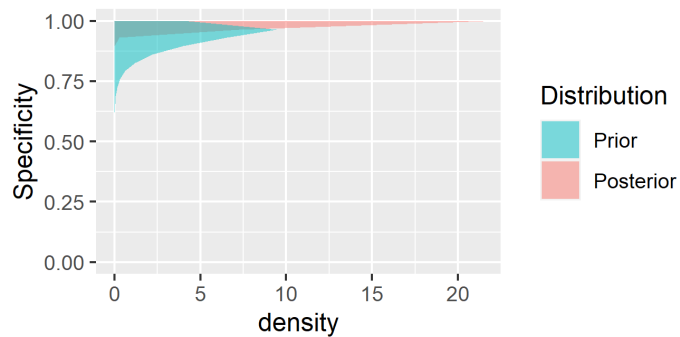

Standard SIT

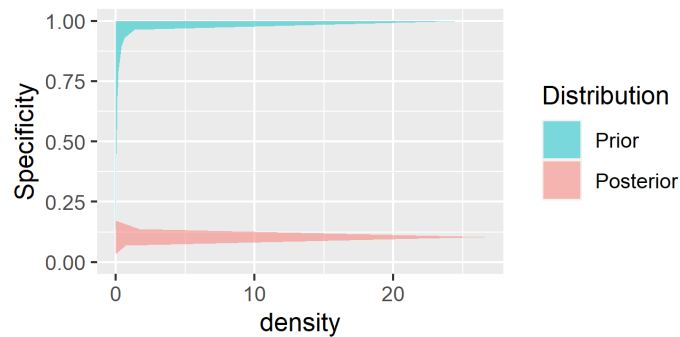

Standard SIT

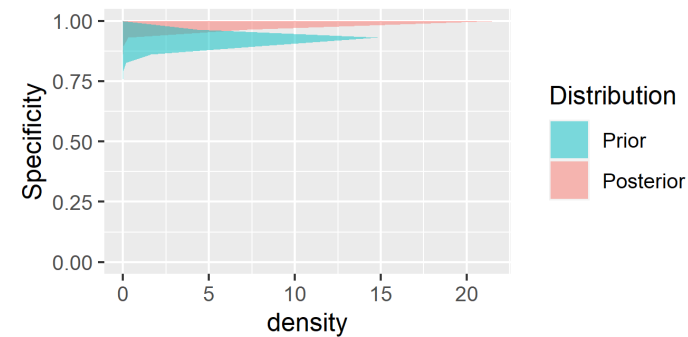

Standard SIT

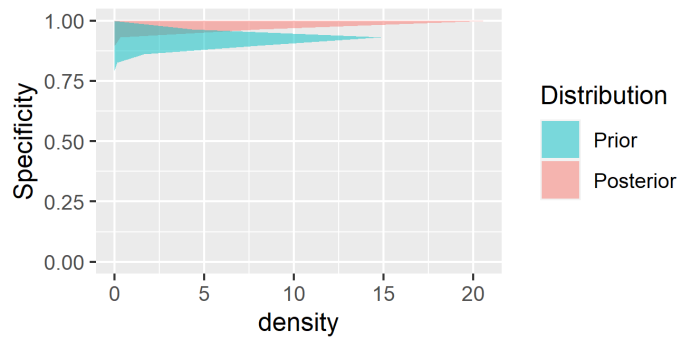

Standard SIT

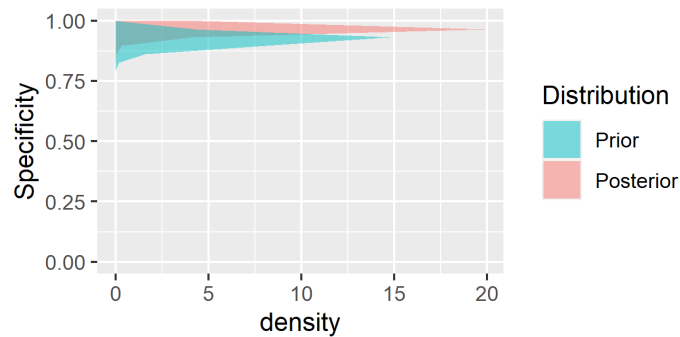

Standard SIT

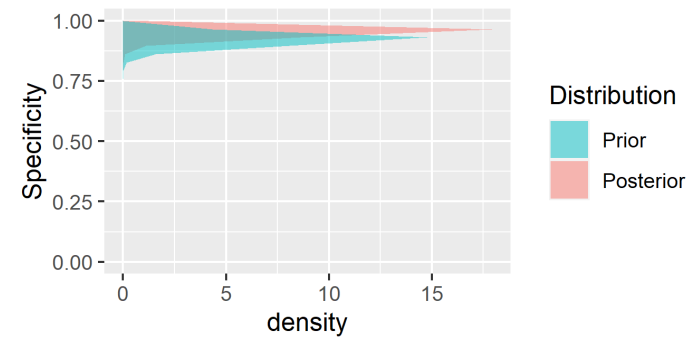

Standard SIT

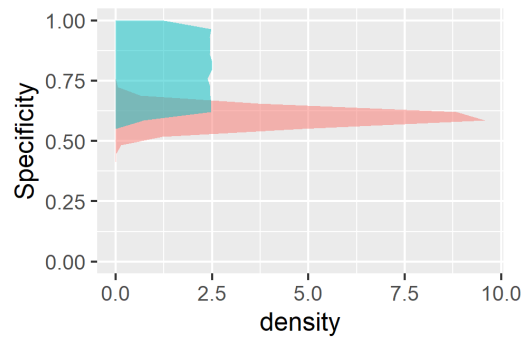

Supplement: f1 [file 7615716.f1.zip]
