# Supplementary material for: Accuracy of Tests for Diagnosis of Animal Tuberculosis: Moving Away from the Golden Calf (and towards Bayesian Models)
Source: Hindawi journal article supplement (doi:10.1155/2023/7615716), 2023-02-21
Supplement: f1 [file 7615716.f1.zip]

## Supplementary Material 1

### **Accuracy of Tests for Diagnosis of Animal Tuberculosis: Moving Away from the Golden Calf (and towards Bayesian Models)**

Alberto Gomez-Buendia<sup>1</sup>, Pilar Pozo<sup>1</sup>, Catalina Picasso-Risso<sup>2,3</sup>, Adam Branscum<sup>4</sup>,  
Andres Perez<sup>2</sup>, Julio Alvarez<sup>1,5\*</sup>

<sup>1</sup> VISAVET Health Surveillance Centre, Universidad Complutense de Madrid, Spain

<sup>2</sup> Veterinary Population Medicine Department, University of Minnesota, St Paul  
Minnesota, United States

<sup>3</sup> Facultad de Veterinaria, Universidad de la República, Montevideo, Uruguay

<sup>4</sup> Biostatistics Program, Oregon State University, Corvallis Oregon, United States

<sup>5</sup> Departamento de Sanidad Animal, Facultad de Veterinaria, Universidad Complutense  
de Madrid, Madrid, Spain

**\* Correspondence:**

Dr. Julio Álvarez

[jalvarez@visavet.ucm.es](mailto:jalvarez@visavet.ucm.es)

## **Overlap in-house function performed in R to estimate the percentage of overlap between prior and posterior distributions**

**#a and b are the parameters of the first beta distribution**

```
f1 = function(x) {  
  dbeta(x, a, b)  
}
```

**#c and d are the parameters of the first beta distribution**

```
f2 = function(x) {  
  dbeta(x, c, d)  
}
```

**#overlap function**

```
overlap = function(f,g, from=0, to=1) {  
  minf = function(x) return(pmin(f(x), g(x)))  
  integrate(minf, from, to)}  
}
```

**#check that the overlap of f1 with itself is 1**

```
overlap(f1, f1)
```

**#same for f2**

```
overlap(f2, f2)
```

```
o12 = overlap(f1, f2)
```

**#this is the overlap value between the two (prior and posterior) beta distributions:**

```
o12$value
```
