# Supplementary material for: Accuracy of Tests for Diagnosis of Animal Tuberculosis: Moving Away from the Golden Calf (and towards Bayesian Models)
Source: Hindawi journal article supplement (doi:10.1155/2023/7615716), 2023-02-21

## Supplementary Material 2

### **Accuracy of Tests for Diagnosis of Animal Tuberculosis: Moving Away from the Golden Calf (and towards Bayesian Models)**

Alberto Gomez-Buendia<sup>1</sup>, Pilar Pozo<sup>1</sup>, Catalina Picasso-Risso<sup>2,3</sup>, Adam Branscum<sup>4</sup>,  
Andres Perez<sup>2</sup>, Julio Alvarez<sup>1,5\*</sup>

<sup>1</sup> VISAVET Health Surveillance Centre, Universidad Complutense de Madrid, Spain

<sup>2</sup> Veterinary Population Medicine Department, University of Minnesota, St Paul  
Minnesota, United States

<sup>3</sup> Facultad de Veterinaria, Universidad de la República, Montevideo, Uruguay

<sup>4</sup> Biostatistics Program, Oregon State University, Corvallis Oregon, United States

<sup>5</sup> Departamento de Sanidad Animal, Facultad de Veterinaria, Universidad Complutense  
de Madrid, Madrid, Spain

**\* Correspondence:**

Dr. Julio Álvarez

[jalvarez@visavet.ucm.es](mailto:jalvarez@visavet.ucm.es)

**Correlation plots between sample size and posterior PIW (probability interval width) for sensitivity and specificity**

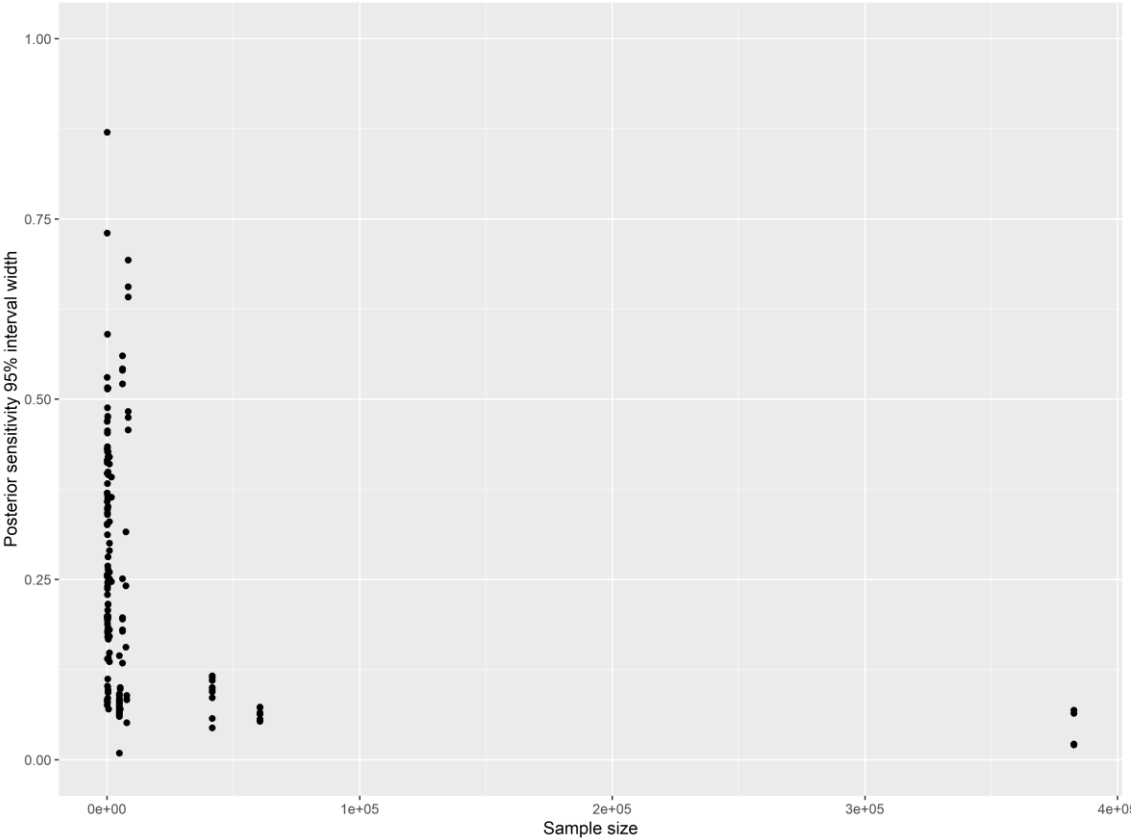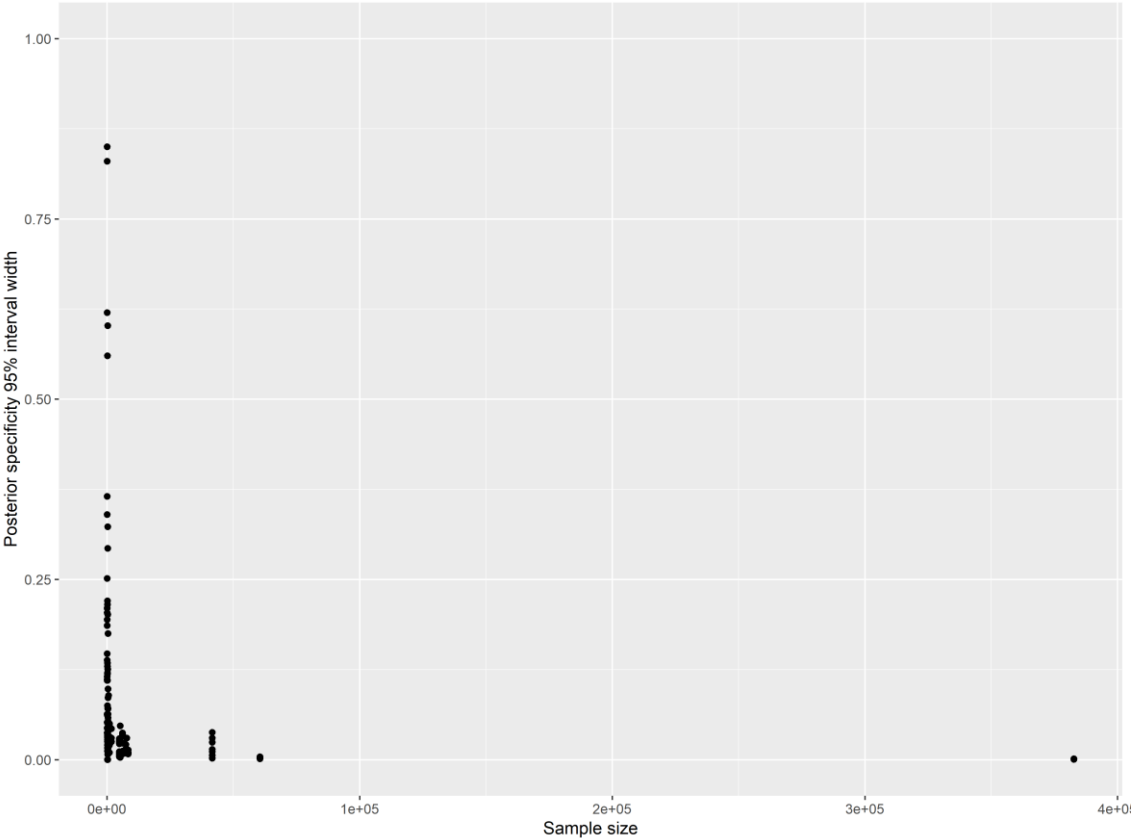

Supplement: f1 [file 7615716.f1.zip]
