# Supplementary material for: Accuracy of Tests for Diagnosis of Animal Tuberculosis: Moving Away from the Golden Calf (and towards Bayesian Models)
Source: Transbound Emerg Dis. 2023 Feb 21;2023:7615716. doi: 10.1155/2023/7615716 (PMC12017179; doi:10.1155/2023/7615716)
Supplement: Supplementary Materials — Supplementary Material 1: Overlap in-house function performed in R to estimate the percentage of overlap between prior and posterior distributions. Supplementary Material 2: Correlation plots between sample size and posterior PIW (probability interval width) for sensitivity and specificity. Supplementary Material 3: Prior and posterior distributions of sensitivities of antemortem and postmortem diagnostic tests for tuberculosis based on informative priors. [file 7615716.f1.zip]

Archive with 3 entries (3 files):
- SuppInfo_1.pdf
- SuppInfo_2.pdf
- SuppInfo_3.pdf
